# Supplementary material for: Brain functional connectivity difference in the complete network of an entire village: the role of social network size and embeddedness
Source: PubMed Central journal article supplement (PMC5493622; doi:10.1038/s41598-017-04904-1), 2017-06-30
Supplement: 41598_2017_4904_MOESM1_ESM.pdf [file 41598_2017_4904_MOESM1_ESM.pdf]

**Brain functional connectivity difference in the complete network of an entire village  
: the role of social network size and embeddedness**

Won-tak Joo<sup>1</sup>, Seyul Kwak<sup>2</sup>, Yoosik Youm<sup>3\*</sup>, Jeanyung Chey<sup>2\*</sup>

<sup>1</sup> Department of Sociology, University of Wisconsin-Madison

<sup>2</sup> Department of Psychology, Seoul National University

<sup>3</sup> Department of Sociology, Yonsei University

\* Corresponding authors:

Yoosik Youm (Department of Sociology, Yonsei University; Yonsei-ro 50, Seodaemun-gu, Seoul, South Korea; [yoosik@yonsei.ac.kr](mailto:yoosik@yonsei.ac.kr); +82-2-2123-2431)

Jeanyung Chey (Department of Psychology, Seoul National University; Gwanak-ro 1, Gwanak-gu, Seoul, South Korea; [jychey@snu.ac.kr](mailto:jychey@snu.ac.kr); +82-2-880-6432)

## Supplementary Tables

Table S1. Brain Regions Of Interest (ROIs) in functional network components associated with age detected by Network Based Statistics (NBS) (regions from the Anatomical Automatic Labeling atlas)

|    |                                                | Brain ROIs |                                              | T     | Component threshold |                 |
|----|------------------------------------------------|------------|----------------------------------------------|-------|---------------------|-----------------|
|    | Source                                         |            | Target                                       |       | p<0.01              | p<0.005 p<0.001 |
| 1  | Precentral gyrus (Left)                        | 80         | Heschl gyrus (Right)                         | -3.34 | *                   | *               |
| 1  | Precentral gyrus (Left)                        | 81         | Superior temporal gyrus (Left)               | -2.68 | *                   |                 |
| 1  | Precentral gyrus (Left)                        | 82         | Superior temporal gyrus (Right)              | -2.76 | *                   |                 |
| 1  | Precentral gyrus (Left)                        | 90         | Inferior temporal gyrus (Right)              | -3.52 | *                   | *               |
| 2  | Precentral gyrus (Right)                       | 90         | Inferior temporal gyrus (Right)              | -3.36 | *                   | *               |
| 3  | Superior frontal gyrus, dorsolateral (Left)    | 47         | Lingual gyrus (Left)                         | -2.73 | *                   |                 |
| 3  | Superior frontal gyrus, dorsolateral (Left)    | 64         | Supramarginal gyrus (Right)                  | -2.75 | *                   |                 |
| 3  | Superior frontal gyrus, dorsolateral (Left)    | 80         | Heschl gyrus (Right)                         | -2.91 | *                   |                 |
| 4  | Superior frontal gyrus, dorsolateral (Right)   | 51         | Middle occipital gyrus (Left)                | -2.82 | *                   |                 |
| 4  | Superior frontal gyrus, dorsolateral (Right)   | 53         | Inferior occipital gyrus (Left)              | -3.10 | *                   | *               |
| 4  | Superior frontal gyrus, dorsolateral (Right)   | 54         | Inferior occipital gyrus (Right)             | -2.85 | *                   |                 |
| 5  | Superior frontal gyrus, orbital part (Left)    | 6          | Superior frontal gyrus, orbital part (Right) | -2.74 | *                   |                 |
| 5  | Superior frontal gyrus, orbital part (Left)    | 7          | Middle frontal gyrus (Left)                  | -2.94 | *                   |                 |
| 5  | Superior frontal gyrus, orbital part (Left)    | 8          | Middle frontal gyrus (Right)                 | -3.23 | *                   |                 |
| 5  | Superior frontal gyrus, orbital part (Left)    | 30         | Insula (Right)                               | -3.88 | *                   |                 |
| 6  | Superior frontal gyrus, orbital part (Right)   | 7          | Middle frontal gyrus (Left)                  | -2.74 | *                   |                 |
| 6  | Superior frontal gyrus, orbital part (Right)   | 72         | Caudate nucleus (Right)                      | -2.68 | *                   |                 |
| 7  | Middle frontal gyrus (Left)                    | 86         | Middle temporal gyrus (Right)                | -2.81 | *                   |                 |
| 11 | Inferior frontal gyrus, opercular part (Left)  | 46         | Cuneus (Right)                               | -2.69 | *                   |                 |
| 11 | Inferior frontal gyrus, opercular part (Left)  | 82         | Superior temporal gyrus (Right)              | -3.55 | *                   | *               |
| 12 | Inferior frontal gyrus, opercular part (Right) | 51         | Middle occipital gyrus (Left)                | -2.76 | *                   |                 |
| 12 | Inferior frontal gyrus, opercular part (Right) | 53         | Inferior occipital gyrus (Left)              | -2.93 | *                   | *               |
| 12 | Inferior frontal gyrus, opercular part (Right) | 85         | Middle temporal gyrus (Left)                 | -3.05 | *                   | *               |

|    |                                                |    |                                                                  |       |   |   |
|----|------------------------------------------------|----|------------------------------------------------------------------|-------|---|---|
| 13 | Inferior frontal gyrus, triangular part (Left) | 82 | Superior temporal gyrus (Right)                                  | -3.28 | * | * |
| 13 | Inferior frontal gyrus, triangular part (Left) | 86 | Middle temporal gyrus (Right)                                    | -2.82 | * |   |
| 15 | Inferior frontal gyrus, orbital part (Left)    | 72 | Caudate nucleus (Right)                                          | -3.01 | * | * |
| 15 | Inferior frontal gyrus, orbital part (Left)    | 78 | Thalamus (Right)                                                 | -2.75 | * |   |
| 18 | Rolandic operculum (Right)                     | 61 | Inferior parietal,<br>but supramarginal and angular gyri (Left)  | -2.93 | * | * |
| 18 | Rolandic operculum (Right)                     | 62 | Inferior parietal,<br>but supramarginal and angular gyri (Right) | -2.68 | * |   |
| 19 | Supplementary motor area (Left)                | 80 | Heschl gyrus (Right)                                             | -3.08 | * | * |
| 19 | Supplementary motor area (Left)                | 82 | Superior temporal gyrus (Right)                                  | -3.16 | * | * |
| 19 | Supplementary motor area (Left)                | 85 | Middle temporal gyrus (Left)                                     | -2.72 | * |   |
| 19 | Supplementary motor area (Left)                | 90 | Inferior temporal gyrus (Right)                                  | -2.83 | * |   |
| 20 | Supplementary motor area (Right)               | 79 | Heschl gyrus (Left)                                              | -2.81 | * |   |
| 20 | Supplementary motor area (Right)               | 80 | Heschl gyrus (Right)                                             | -3.03 | * | * |
| 20 | Supplementary motor area (Right)               | 85 | Middle temporal gyrus (Left)                                     | -2.93 | * | * |
| 20 | Supplementary motor area (Right)               | 90 | Inferior temporal gyrus (Right)                                  | -2.79 | * |   |
| 23 | Superior frontal gyrus, medial (Left)          | 54 | Inferior occipital gyrus (Right)                                 | -2.83 | * |   |
| 24 | Superior frontal gyrus, medial (Right)         | 53 | Inferior occipital gyrus (Left)                                  | -2.96 | * | * |
| 24 | Superior frontal gyrus, medial (Right)         | 54 | Inferior occipital gyrus (Right)                                 | -3.18 | * | * |
| 25 | Superior frontal gyrus, medial orbital (Left)  | 26 | Superior frontal gyrus, medial orbital (Right)                   | -2.77 | * |   |
| 25 | Superior frontal gyrus, medial orbital (Left)  | 54 | Inferior occipital gyrus (Right)                                 | -2.70 | * |   |
| 25 | Superior frontal gyrus, medial orbital (Left)  | 72 | Caudate nucleus (Right)                                          | -2.88 | * |   |
| 27 | Gyrus rectus (Left)                            | 54 | Inferior occipital gyrus (Right)                                 | -2.99 | * | * |
| 28 | Gyrus rectus (Right)                           | 54 | Inferior occipital gyrus (Right)                                 | -3.18 | * | * |
| 28 | Gyrus rectus (Right)                           | 72 | Caudate nucleus (Right)                                          | -3.92 | * | * |
| 29 | Insula (Left)                                  | 33 | Median cingulate and paracingulate gyri (Left)                   | -4.05 | * | * |
| 29 | Insula (Left)                                  | 34 | Median cingulate and paracingulate gyri (Right)                  | -4.36 | * | * |
| 29 | Insula (Left)                                  | 62 | Inferior parietal,<br>but supramarginal and angular gyri (Right) | -3.93 | * | * |
| 29 | Insula (Left)                                  | 64 | Supramarginal gyrus (Right)                                      | -3.63 | * | * |
| 29 | Insula (Left)                                  | 77 | Thalamus (Left)                                                  | -3.16 | * |   |

|    |                                                                  |    |                                               |       |   |   |
|----|------------------------------------------------------------------|----|-----------------------------------------------|-------|---|---|
| 31 | Anterior cingulate and paracingulate gyri (Left)                 | 40 | Parahippocampal gyrus (Right)                 | -3.53 | * |   |
| 32 | Anterior cingulate and paracingulate gyri (Right)                | 40 | Parahippocampal gyrus (Right)                 | -3.55 | * |   |
| 32 | Anterior cingulate and paracingulate gyri (Right)                | 65 | Angular gyrus (Left)                          | -3.03 | * |   |
| 33 | Median cingulate and paracingulate gyri (Left)                   | 39 | Parahippocampal gyrus (Left)                  | -2.72 | * |   |
| 35 | Posterior cingulate gyrus (Left)                                 | 74 | Lenticular nucleus, putamen (Right)           | -2.71 | * |   |
| 39 | Parahippocampal gyrus (Left)                                     | 73 | Lenticular nucleus, putamen (Left)            | -2.78 | * |   |
| 39 | Parahippocampal gyrus (Left)                                     | 75 | Lenticular nucleus, pallidum (Left)           | -3.90 | * |   |
| 39 | Parahippocampal gyrus (Left)                                     | 76 | Lenticular nucleus, pallidum (Right)          | -3.95 | * |   |
| 40 | Parahippocampal gyrus (Right)                                    | 88 | Temporal pole: middle temporal gyrus (Right)  | -2.70 | * |   |
| 42 | Amygdala (Right)                                                 | 75 | Lenticular nucleus, pallidum (Left)           | -3.81 | * |   |
| 43 | Calcarine fissure and surrounding cortex (Left)                  | 87 | Temporal pole: middle temporal gyrus (Left)   | -2.81 | * |   |
| 44 | Calcarine fissure and surrounding cortex (Right)                 | 74 | Lenticular nucleus, putamen (Right)           | -2.94 | * | * |
| 44 | Calcarine fissure and surrounding cortex (Right)                 | 87 | Temporal pole: middle temporal gyrus (Left)   | -2.67 | * |   |
| 45 | Cuneus (Left)                                                    | 74 | Lenticular nucleus, putamen (Right)           | -2.72 | * |   |
| 47 | Lingual gyrus (Left)                                             | 74 | Lenticular nucleus, putamen (Right)           | -2.94 | * | * |
| 51 | Middle occipital gyrus (Left)                                    | 74 | Lenticular nucleus, putamen (Right)           | -3.04 | * | * |
| 51 | Middle occipital gyrus (Left)                                    | 87 | Temporal pole: middle temporal gyrus (Left)   | -3.41 | * | * |
| 52 | Middle occipital gyrus (Right)                                   | 87 | Temporal pole: middle temporal gyrus (Left)   | -3.23 | * | * |
| 52 | Middle occipital gyrus (Right)                                   | 88 | Temporal pole: middle temporal gyrus (Right)  | -2.86 | * |   |
| 53 | Inferior occipital gyrus (Left)                                  | 87 | Temporal pole: middle temporal gyrus (Left)   | -2.75 | * |   |
| 54 | Inferior occipital gyrus (Right)                                 | 87 | Temporal pole: middle temporal gyrus (Left)   | -3.68 | * | * |
| 55 | Fusiform gyrus (Left)                                            | 87 | Temporal pole: middle temporal gyrus (Left)   | -3.51 | * | * |
| 56 | Fusiform gyrus (Right)                                           | 87 | Temporal pole: middle temporal gyrus (Left)   | -3.26 | * | * |
| 57 | Postcentral gyrus (Left)                                         | 80 | Heschl gyrus (Right)                          | -2.84 | * |   |
| 57 | Postcentral gyrus (Left)                                         | 90 | Inferior temporal gyrus (Right)               | -2.84 | * |   |
| 58 | Postcentral gyrus (Right)                                        | 90 | Inferior temporal gyrus (Right)               | -2.86 | * |   |
| 61 | Inferior parietal,<br>but supramarginal and angular gyri (Left)  | 74 | Lenticular nucleus, putamen (Right)           | -3.31 | * | * |
| 62 | Inferior parietal,<br>but supramarginal and angular gyri (Right) | 83 | Temporal pole: superior temporal gyrus (Left) | -2.92 | * |   |

|    |                                     |    |                                                |       |   |
|----|-------------------------------------|----|------------------------------------------------|-------|---|
| 64 | Supramarginal gyrus (Right)         | 83 | Temporal pole: superior temporal gyrus (Left)  | -2.80 | * |
| 73 | Lenticular nucleus, putamen (Left)  | 75 | Lenticular nucleus, pallidum (Left)            | -3.61 | * |
| 73 | Lenticular nucleus, putamen (Left)  | 76 | Lenticular nucleus, pallidum (Right)           | -3.43 | * |
| 74 | Lenticular nucleus, putamen (Right) | 76 | Lenticular nucleus, pallidum (Right)           | -2.77 | * |
| 74 | Lenticular nucleus, putamen (Right) | 85 | Middle temporal gyrus (Left)                   | -2.77 | * |
| 75 | Lenticular nucleus, pallidum (Left) | 76 | Lenticular nucleus, pallidum (Right)           | -3.12 | * |
| 79 | Heschl gyrus (Left)                 | 84 | Temporal pole: superior temporal gyrus (Right) | -3.11 | * |

---

Table S2. Brain Regions Of Interest (ROIs) in functional network components associated with social network size detected by Network Based Statistics (NBS), component threshold of  $p < 0.001$  (regions from the Anatomical Automatic Labeling atlas)

| Source |                                                 | Brain ROIs |                                             | Target | T    |
|--------|-------------------------------------------------|------------|---------------------------------------------|--------|------|
| 42     | Amygdala (Right)                                | 87         | Temporal pole: middle temporal gyrus (Left) |        | 3.59 |
| 43     | Calcarine fissure and surrounding cortex (Left) | 87         | Temporal pole: middle temporal gyrus (Left) |        | 4.04 |
| 47     | Lingual gyrus (Left)                            | 87         | Temporal pole: middle temporal gyrus (Left) |        | 4.37 |
| 48     | Lingual gyrus (Right)                           | 87         | Temporal pole: middle temporal gyrus (Left) |        | 4.03 |
| 53     | Inferior occipital gyrus (Left)                 | 87         | Temporal pole: middle temporal gyrus (Left) |        | 3.48 |
| 55     | Fusiform gyrus (Left)                           | 87         | Temporal pole: middle temporal gyrus (Left) |        | 3.87 |

Table S3. Brain Regions Of Interest (ROIs) in functional network components associated with social network embeddedness (continuous) detected by Network Based Statistics (NBS) (regions from the Anatomical Automatic Labeling atlas)

|        |                                                 | Brain ROIs |                                                 | T    | Component threshold |         |         |
|--------|-------------------------------------------------|------------|-------------------------------------------------|------|---------------------|---------|---------|
| Source |                                                 | Target     |                                                 |      | p<0.01              | p<0.005 | p<0.001 |
| 12     | Inferior frontal gyrus, opercular part (Right)  | 43         | Calcarine fissure and surrounding cortex (Left) | 2.96 | *                   | *       |         |
| 12     | Inferior frontal gyrus, opercular part (Right)  | 45         | Cuneus (Left)                                   | 3.23 | *                   | *       |         |
| 12     | Inferior frontal gyrus, opercular part (Right)  | 46         | Cuneus (Right)                                  | 3.00 | *                   | *       |         |
| 12     | Inferior frontal gyrus, opercular part (Right)  | 49         | Superior occipital gyrus (Left)                 | 3.57 | *                   | *       | *       |
| 12     | Inferior frontal gyrus, opercular part (Right)  | 50         | Superior occipital gyrus (Right)                | 3.54 | *                   | *       | *       |
| 12     | Inferior frontal gyrus, opercular part (Right)  | 58         | Postcentral gyrus (Right)                       | 3.47 | *                   | *       |         |
| 14     | Inferior frontal gyrus, triangular part (Right) | 58         | Postcentral gyrus (Right)                       | 3.13 | *                   | *       |         |
| 14     | Inferior frontal gyrus, triangular part (Right) | 79         | Heschl gyrus (Left)                             | 2.80 | *                   |         |         |
| 16     | Inferior frontal gyrus, orbital part (Right)    | 17         | Rolandic operculum (Left)                       | 2.71 | *                   |         |         |
| 16     | Inferior frontal gyrus, orbital part (Right)    | 43         | Calcarine fissure and surrounding cortex (Left) | 3.10 | *                   | *       |         |
| 16     | Inferior frontal gyrus, orbital part (Right)    | 45         | Cuneus (Left)                                   | 4.14 | *                   | *       | *       |
| 16     | Inferior frontal gyrus, orbital part (Right)    | 46         | Cuneus (Right)                                  | 3.66 | *                   | *       | *       |
| 16     | Inferior frontal gyrus, orbital part (Right)    | 47         | Lingual gyrus (Left)                            | 2.75 | *                   |         |         |
| 16     | Inferior frontal gyrus, orbital part (Right)    | 49         | Superior occipital gyrus (Left)                 | 4.45 | *                   | *       | *       |
| 16     | Inferior frontal gyrus, orbital part (Right)    | 50         | Superior occipital gyrus (Right)                | 3.36 | *                   | *       |         |
| 17     | Rolandic operculum (Left)                       | 76         | Lenticular nucleus, pallidum (Right)            | 3.00 | *                   | *       |         |
| 18     | Rolandic operculum (Right)                      | 51         | Middle occipital gyrus (Left)                   | 2.68 | *                   |         |         |
| 29     | Insula (Left)                                   | 46         | Cuneus (Right)                                  | 3.60 | *                   | *       | *       |
| 29     | Insula (Left)                                   | 50         | Superior occipital gyrus (Right)                | 3.00 | *                   | *       |         |
| 29     | Insula (Left)                                   | 67         | Precuneus (Left)                                | 2.92 | *                   | *       |         |
| 29     | Insula (Left)                                   | 68         | Precuneus (Right)                               | 2.89 | *                   |         |         |
| 30     | Insula (Right)                                  | 45         | Cuneus (Left)                                   | 4.39 | *                   | *       | *       |
| 30     | Insula (Right)                                  | 46         | Cuneus (Right)                                  | 3.80 | *                   | *       | *       |
| 30     | Insula (Right)                                  | 49         | Superior occipital gyrus (Left)                 | 3.18 | *                   | *       |         |
| 30     | Insula (Right)                                  | 50         | Superior occipital gyrus (Right)                | 3.30 | *                   | *       |         |

|    |                                 |    |                                                  |      |   |   |   |
|----|---------------------------------|----|--------------------------------------------------|------|---|---|---|
| 30 | Insula (Right)                  | 51 | Middle occipital gyrus (Left)                    | 3.78 | * | * | * |
| 30 | Insula (Right)                  | 52 | Middle occipital gyrus (Right)                   | 3.45 | * | * |   |
| 30 | Insula (Right)                  | 58 | Postcentral gyrus (Right)                        | 2.67 | * |   |   |
| 30 | Insula (Right)                  | 69 | Paracentral lobule (Left)                        | 2.68 | * |   |   |
| 39 | Parahippocampal gyrus (Left)    | 44 | Calcarine fissure and surrounding cortex (Right) | 2.84 | * |   |   |
| 39 | Parahippocampal gyrus (Left)    | 52 | Middle occipital gyrus (Right)                   | 2.94 | * | * |   |
| 41 | Amygdala (Left)                 | 45 | Cuneus (Left)                                    | 2.81 | * |   |   |
| 41 | Amygdala (Left)                 | 46 | Cuneus (Right)                                   | 2.79 | * |   |   |
| 42 | Amygdala (Right)                | 51 | Middle occipital gyrus (Left)                    | 3.26 | * | * |   |
| 42 | Amygdala (Right)                | 52 | Middle occipital gyrus (Right)                   | 3.11 | * | * |   |
| 42 | Amygdala (Right)                | 67 | Precuneus (Left)                                 | 3.67 | * | * |   |
| 46 | Cuneus (Right)                  | 63 | Supramarginal gyrus (Left)                       | 3.01 | * | * |   |
| 49 | Superior occipital gyrus (Left) | 76 | Lenticular nucleus, pallidum (Right)             | 2.72 | * |   |   |
| 51 | Middle occipital gyrus (Left)   | 74 | Lenticular nucleus, putamen (Right)              | 2.83 | * |   |   |
| 51 | Middle occipital gyrus (Left)   | 80 | Heschl gyrus (Right)                             | 2.98 | * | * |   |
| 51 | Middle occipital gyrus (Left)   | 82 | Superior temporal gyrus (Right)                  | 3.15 | * | * |   |
| 52 | Middle occipital gyrus (Right)  | 80 | Heschl gyrus (Right)                             | 3.39 | * | * |   |
| 57 | Postcentral gyrus (Left)        | 76 | Lenticular nucleus, pallidum (Right)             | 2.90 | * |   |   |
| 58 | Postcentral gyrus (Right)       | 63 | Supramarginal gyrus (Left)                       | 2.69 | * |   |   |
| 58 | Postcentral gyrus (Right)       | 74 | Lenticular nucleus, putamen (Right)              | 2.87 | * |   |   |
| 58 | Postcentral gyrus (Right)       | 76 | Lenticular nucleus, pallidum (Right)             | 2.94 | * | * |   |
| 67 | Precuneus (Left)                | 73 | Lenticular nucleus, putamen (Left)               | 3.46 | * | * |   |
| 69 | Paracentral lobule (Left)       | 74 | Lenticular nucleus, putamen (Right)              | 3.06 | * |   |   |

---



Table S4. Brain Regions Of Interest (ROIs) in functional network components associated with social network embeddedness (low=0, high=1) detected by Network Based Statistics (NBS) (regions from the Anatomical Automatic Labeling atlas)

|    | Source                                          | Brain ROIs |                                                | T    | Component threshold |         |         |
|----|-------------------------------------------------|------------|------------------------------------------------|------|---------------------|---------|---------|
|    |                                                 |            | Target                                         |      | p<0.01              | p<0.005 | p<0.001 |
| 3  | Superior frontal gyrus, dorsolateral (Left)     | 37         | Hippocampus (Left)                             | 2.76 | *                   |         |         |
| 3  | Superior frontal gyrus, dorsolateral (Left)     | 40         | Parahippocampal gyrus (Right)                  | 2.83 | *                   |         |         |
| 8  | Middle frontal gyrus (Right)                    | 58         | Postcentral gyrus (Right)                      | 3.14 | *                   | *       |         |
| 12 | Inferior frontal gyrus, opercular part (Right)  | 33         | Median cingulate and paracingulate gyri (Left) | 3.53 | *                   | *       |         |
| 12 | Inferior frontal gyrus, opercular part (Right)  | 40         | Parahippocampal gyrus (Right)                  | 2.97 | *                   | *       |         |
| 12 | Inferior frontal gyrus, opercular part (Right)  | 58         | Postcentral gyrus (Right)                      | 2.85 | *                   |         |         |
| 12 | Inferior frontal gyrus, opercular part (Right)  | 77         | Thalamus (Left)                                | 2.78 | *                   |         |         |
| 12 | Inferior frontal gyrus, opercular part (Right)  | 78         | Thalamus (Right)                               | 3.19 | *                   | *       |         |
| 14 | Inferior frontal gyrus, triangular part (Right) | 33         | Median cingulate and paracingulate gyri (Left) | 3.47 | *                   | *       |         |
| 14 | Inferior frontal gyrus, triangular part (Right) | 58         | Postcentral gyrus (Right)                      | 2.90 | *                   |         |         |
| 14 | Inferior frontal gyrus, triangular part (Right) | 63         | Supramarginal gyrus (Left)                     | 3.43 | *                   | *       |         |
| 14 | Inferior frontal gyrus, triangular part (Right) | 64         | Supramarginal gyrus (Right)                    | 3.01 | *                   | *       |         |
| 14 | Inferior frontal gyrus, triangular part (Right) | 77         | Thalamus (Left)                                | 2.99 | *                   | *       |         |
| 14 | Inferior frontal gyrus, triangular part (Right) | 78         | Thalamus (Right)                               | 2.82 | *                   |         |         |
| 16 | Inferior frontal gyrus, orbital part (Right)    | 38         | Hippocampus (Right)                            | 2.83 | *                   |         |         |
| 16 | Inferior frontal gyrus, orbital part (Right)    | 58         | Postcentral gyrus (Right)                      | 3.10 | *                   | *       |         |
| 17 | Rolandic operculum (Left)                       | 77         | Thalamus (Left)                                | 3.17 | *                   | *       |         |
| 18 | Rolandic operculum (Right)                      | 77         | Thalamus (Left)                                | 3.22 | *                   | *       |         |
| 22 | Olfactory cortex (Right)                        | 69         | Paracentral lobule (Left)                      | 2.74 | *                   |         |         |
| 22 | Olfactory cortex (Right)                        | 70         | Paracentral lobule (Right)                     | 2.69 | *                   |         |         |
| 29 | Insula (Left)                                   | 45         | Cuneus (Left)                                  | 3.37 | *                   | *       |         |
| 29 | Insula (Left)                                   | 46         | Cuneus (Right)                                 | 3.29 | *                   | *       |         |
| 29 | Insula (Left)                                   | 50         | Superior occipital gyrus (Right)               | 3.10 | *                   | *       |         |
| 29 | Insula (Left)                                   | 52         | Middle occipital gyrus (Right)                 | 3.09 | *                   | *       |         |
| 29 | Insula (Left)                                   | 60         | Superior parietal gyrus (Right)                | 2.74 | *                   |         |         |

|    |                                                   |    |                                  |      |   |   |   |
|----|---------------------------------------------------|----|----------------------------------|------|---|---|---|
| 29 | Insula (Left)                                     | 67 | Precuneus (Left)                 | 3.91 | * | * | * |
| 29 | Insula (Left)                                     | 68 | Precuneus (Right)                | 3.48 | * | * | * |
| 30 | Insula (Right)                                    | 45 | Cuneus (Left)                    | 3.17 | * | * |   |
| 30 | Insula (Right)                                    | 46 | Cuneus (Right)                   | 2.90 | * |   |   |
| 30 | Insula (Right)                                    | 50 | Superior occipital gyrus (Right) | 2.81 | * |   |   |
| 30 | Insula (Right)                                    | 52 | Middle occipital gyrus (Right)   | 2.88 | * |   |   |
| 30 | Insula (Right)                                    | 67 | Precuneus (Left)                 | 3.02 | * | * |   |
| 30 | Insula (Right)                                    | 68 | Precuneus (Right)                | 2.70 | * |   |   |
| 31 | Anterior cingulate and paracingulate gyri (Left)  | 59 | Superior parietal gyrus (Left)   | 3.73 | * | * | * |
| 31 | Anterior cingulate and paracingulate gyri (Left)  | 60 | Superior parietal gyrus (Right)  | 3.12 | * | * |   |
| 31 | Anterior cingulate and paracingulate gyri (Left)  | 66 | Angular gyrus (Right)            | 3.61 | * | * | * |
| 31 | Anterior cingulate and paracingulate gyri (Left)  | 67 | Precuneus (Left)                 | 3.97 | * | * | * |
| 31 | Anterior cingulate and paracingulate gyri (Left)  | 68 | Precuneus (Right)                | 3.24 | * | * |   |
| 32 | Anterior cingulate and paracingulate gyri (Right) | 58 | Postcentral gyrus (Right)        | 3.11 | * | * |   |
| 32 | Anterior cingulate and paracingulate gyri (Right) | 59 | Superior parietal gyrus (Left)   | 3.87 | * | * | * |
| 32 | Anterior cingulate and paracingulate gyri (Right) | 60 | Superior parietal gyrus (Right)  | 3.18 | * | * |   |
| 32 | Anterior cingulate and paracingulate gyri (Right) | 66 | Angular gyrus (Right)            | 3.03 | * | * |   |
| 32 | Anterior cingulate and paracingulate gyri (Right) | 67 | Precuneus (Left)                 | 3.99 | * | * | * |
| 32 | Anterior cingulate and paracingulate gyri (Right) | 68 | Precuneus (Right)                | 2.85 | * |   |   |
| 32 | Anterior cingulate and paracingulate gyri (Right) | 70 | Paracentral lobule (Right)       | 2.75 | * |   |   |
| 33 | Median cingulate and paracingulate gyri (Left)    | 60 | Superior parietal gyrus (Right)  | 2.97 | * | * |   |
| 33 | Median cingulate and paracingulate gyri (Left)    | 71 | Caudate nucleus (Left)           | 2.81 | * |   |   |
| 34 | Median cingulate and paracingulate gyri (Right)   | 58 | Postcentral gyrus (Right)        | 2.72 | * |   |   |
| 34 | Median cingulate and paracingulate gyri (Right)   | 59 | Superior parietal gyrus (Left)   | 3.07 | * | * |   |
| 34 | Median cingulate and paracingulate gyri (Right)   | 60 | Superior parietal gyrus (Right)  | 4.53 | * | * |   |
| 34 | Median cingulate and paracingulate gyri (Right)   | 64 | Supramarginal gyrus (Right)      | 4.05 | * | * |   |
| 34 | Median cingulate and paracingulate gyri (Right)   | 67 | Precuneus (Left)                 | 2.80 | * |   |   |
| 34 | Median cingulate and paracingulate gyri (Right)   | 68 | Precuneus (Right)                | 2.84 | * |   |   |
| 41 | Amygdala (Left)                                   | 45 | Cuneus (Left)                    | 3.16 | * | * |   |
| 42 | Amygdala (Right)                                  | 67 | Precuneus (Left)                 | 3.30 | * | * |   |

|    |                                      |    |                                              |      |   |   |   |
|----|--------------------------------------|----|----------------------------------------------|------|---|---|---|
| 45 | Cuneus (Left)                        | 63 | Supramarginal gyrus (Left)                   | 2.89 | * |   |   |
| 57 | Postcentral gyrus (Left)             | 73 | Lenticular nucleus, putamen (Left)           | 2.72 | * |   |   |
| 57 | Postcentral gyrus (Left)             | 76 | Lenticular nucleus, pallidum (Right)         | 2.98 | * | * |   |
| 58 | Postcentral gyrus (Right)            | 71 | Caudate nucleus (Left)                       | 2.80 | * |   |   |
| 58 | Postcentral gyrus (Right)            | 76 | Lenticular nucleus, pallidum (Right)         | 3.33 | * | * |   |
| 59 | Superior parietal gyrus (Left)       | 71 | Caudate nucleus (Left)                       | 3.83 | * | * | * |
| 59 | Superior parietal gyrus (Left)       | 72 | Caudate nucleus (Right)                      | 3.44 | * | * |   |
| 59 | Superior parietal gyrus (Left)       | 73 | Lenticular nucleus, putamen (Left)           | 2.86 | * |   |   |
| 60 | Superior parietal gyrus (Right)      | 71 | Caudate nucleus (Left)                       | 3.02 | * | * |   |
| 60 | Superior parietal gyrus (Right)      | 72 | Caudate nucleus (Right)                      | 2.85 | * |   |   |
| 67 | Precuneus (Left)                     | 71 | Caudate nucleus (Left)                       | 3.97 | * | * | * |
| 67 | Precuneus (Left)                     | 72 | Caudate nucleus (Right)                      | 3.76 | * | * | * |
| 67 | Precuneus (Left)                     | 88 | Temporal pole: middle temporal gyrus (Right) | 2.98 | * | * |   |
| 68 | Precuneus (Right)                    | 71 | Caudate nucleus (Left)                       | 3.58 | * | * | * |
| 68 | Precuneus (Right)                    | 72 | Caudate nucleus (Right)                      | 3.72 | * | * | * |
| 69 | Paracentral lobule (Left)            | 71 | Caudate nucleus (Left)                       | 2.95 | * | * |   |
| 69 | Paracentral lobule (Left)            | 72 | Caudate nucleus (Right)                      | 2.83 | * |   |   |
| 76 | Lenticular nucleus, pallidum (Right) | 82 | Superior temporal gyrus (Right)              | 2.97 | * | * |   |

---

Table S5. OLS regression analyses predicting mean functional connectivity of components associated with individual characteristics detected by Network Based Statistics (NBS) (n=64) (regions from the Anatomical Automatic Labeling atlas)

|                                                   | (1)<br>Age<br>(p<0.01) | (2)<br>Age<br>(p<0.005) | (3)<br>Age<br>(p<0.001) | (4)<br>Social<br>network<br>size<br>(p<0.001) | (5)<br>Social<br>network<br>embeddedness<br>(continuous)<br>(p<0.01) | (6)<br>Social<br>network<br>embeddedness<br>(continuous)<br>(p<0.005) | (7)<br>Social<br>network<br>embeddedness<br>(continuous)<br>(p<0.001) | (8)<br>Social<br>network<br>embeddedness<br>(low=0,<br>high=1)<br>(p<0.01) | (9)<br>Social<br>network<br>embeddedness<br>(low=0,<br>high=1)<br>(p<0.005) | (10)<br>Social<br>network<br>embeddedness<br>(low=0,<br>high=1)<br>(p<0.001) |
|---------------------------------------------------|------------------------|-------------------------|-------------------------|-----------------------------------------------|----------------------------------------------------------------------|-----------------------------------------------------------------------|-----------------------------------------------------------------------|----------------------------------------------------------------------------|-----------------------------------------------------------------------------|------------------------------------------------------------------------------|
| Female                                            | 0.014<br>(0.66)        | 0.027<br>(1.13)         | 0.045<br>(0.94)         | 0.093<br>(2.39)                               | 0.020<br>(1.11)                                                      | 0.015<br>(0.70)                                                       | 0.009<br>(0.31)                                                       | 0.057<br>(2.78)                                                            | 0.060<br>(2.74)                                                             | 0.085<br>(2.73)                                                              |
| MMSE score                                        | -0.005<br>(-1.44)      | -0.005<br>(-1.08)       | 0.004<br>(0.41)         | -0.009<br>(-1.31)                             | 0.005<br>(1.67)                                                      | 0.007<br>(1.90)                                                       | 0.006<br>(1.18)                                                       | 0.002<br>(0.56)                                                            | 0.002<br>(0.50)                                                             | 0.005<br>(0.88)                                                              |
| Age                                               | -0.012*<br>(-8.57)     | -0.012*<br>(-7.54)      | -0.016*<br>(-4.99)      | -0.010*<br>(-3.59)                            | -0.002<br>(-1.45)                                                    | -0.002<br>(-1.17)                                                     | -0.004<br>(-1.77)                                                     | 0.002<br>(1.20)                                                            | 0.001<br>(0.72)                                                             | 0.000<br>(0.17)                                                              |
| Years of<br>education                             | 0.003<br>(0.85)        | 0.001<br>(0.20)         | 0.010<br>(1.38)         | 0.008<br>(1.34)                               | 0.001<br>(0.25)                                                      | -0.000<br>(-0.13)                                                     | -0.001<br>(-0.27)                                                     | 0.004<br>(1.24)                                                            | 0.003<br>(0.92)                                                             | 0.002<br>(0.36)                                                              |
| Social network<br>size                            | 0.004<br>(1.22)        | 0.004<br>(1.29)         | 0.002<br>(0.35)         | 0.030*<br>(5.25)                              | -0.018*<br>(-6.91)                                                   | -0.019*<br>(-6.08)                                                    | -0.021*<br>(-4.86)                                                    | -0.012*<br>(-4.95)                                                         | -0.013*<br>(-4.97)                                                          | -0.014*<br>(-3.65)                                                           |
| Social network<br>embeddedness<br>(continuous)    | -0.006<br>(-0.82)      | -0.007<br>(-0.86)       | -0.005<br>(-0.29)       | -0.056*<br>(-4.13)                            | 0.057*<br>(9.03)                                                     | 0.059*<br>(7.96)                                                      | 0.064*<br>(6.20)                                                      |                                                                            |                                                                             |                                                                              |
| Social network<br>embeddedness<br>(low=0, high=1) |                        |                         |                         |                                               |                                                                      |                                                                       |                                                                       | 0.223*<br>(8.37)                                                           | 0.233*<br>(8.20)                                                            | 0.259*<br>(6.41)                                                             |
| Intercept                                         | 1.048*<br>(6.69)       | 0.973*<br>(5.41)        | 1.153<br>(3.15)         | 0.861<br>(2.91)                               | -0.129<br>(-0.94)                                                    | -0.189<br>(-1.17)                                                     | -0.063<br>(-0.28)                                                     | -0.269<br>(-1.77)                                                          | -0.233<br>(-1.43)                                                           | -0.396<br>(-1.71)                                                            |
| R <sup>2</sup>                                    | 0.592                  | 0.534                   | 0.406                   | 0.418                                         | 0.634                                                                | 0.573                                                                 | 0.466                                                                 | 0.595                                                                      | 0.590                                                                       | 0.504                                                                        |

Note. T statistics in parentheses; \* p<0.001

Table S6. OLS regression analyses predicting mean functional connectivity of components associated with individual characteristics detected by Network Based Statistics (NBS) after excluding outliers ( $|DFBETA|>0.25$ ) (regions from the Anatomical Automatic Labeling atlas)

|                                                | (1)<br>Age<br>(p<0.01) | (2)<br>Age<br>(p<0.005) | (3)<br>Age<br>(p<0.001) | (4)<br>Social<br>network<br>size<br>(p<0.001) | (5)<br>Social<br>network<br>embeddedness<br>(continuous)<br>(p<0.01) | (6)<br>Social<br>network<br>embeddedness<br>(continuous)<br>(p<0.005) | (7)<br>Social<br>network<br>embeddedness<br>(continuous)<br>(p<0.001) |
|------------------------------------------------|------------------------|-------------------------|-------------------------|-----------------------------------------------|----------------------------------------------------------------------|-----------------------------------------------------------------------|-----------------------------------------------------------------------|
| Female                                         | 0.018<br>(0.90)        | 0.033<br>(1.42)         | 0.093<br>(2.09)         | 0.077<br>(2.05)                               | 0.016<br>(0.88)                                                      | 0.007<br>(0.32)                                                       | 0.005<br>(0.18)                                                       |
| MMSE score                                     | -0.006<br>(-1.55)      | -0.004<br>(-1.01)       | 0.004<br>(0.45)         | -0.005<br>(-0.79)                             | 0.006<br>(1.80)                                                      | 0.007<br>(1.92)                                                       | 0.005<br>(0.88)                                                       |
| Age                                            | -0.012*<br>(-8.35)     | -0.012*<br>(-7.18)      | -0.018*<br>(-5.49)      | -0.011*<br>(-4.33)                            | -0.002<br>(-1.23)                                                    | -0.002<br>(-1.24)                                                     | -0.005<br>(-2.30)                                                     |
| Years of<br>education                          | 0.002<br>(0.76)        | 0.002<br>(0.50)         | 0.009<br>(1.34)         | 0.003<br>(0.59)                               | -0.000<br>(-0.07)                                                    | -0.001<br>(-0.36)                                                     | -0.002<br>(-0.44)                                                     |
| Social network<br>size                         | 0.003<br>(0.87)        | 0.005<br>(1.42)         | 0.001<br>(0.14)         | 0.028*<br>(3.70)                              | -0.016*<br>(-3.75)                                                   | -0.014<br>(-2.73)                                                     | -0.016<br>(-2.22)                                                     |
| Social network<br>embeddedness<br>(continuous) | -0.003<br>(-0.37)      | -0.006<br>(-0.76)       | 0.002<br>(0.16)         | -0.054<br>(-3.46)                             | 0.052*<br>(5.91)                                                     | 0.049*<br>(4.75)                                                      | 0.054*<br>(3.65)                                                      |
| Intercept                                      | 1.048*<br>(6.53)       | 0.915*<br>(5.06)        | 1.214<br>(3.42)         | 0.906<br>(3.23)                               | -0.139<br>(-1.03)                                                    | -0.161<br>(-1.00)                                                     | 0.091<br>(0.39)                                                       |
| N                                              | 61                     | 61                      | 59                      | 61                                            | 58                                                                   | 60                                                                    | 58                                                                    |
| R <sup>2</sup>                                 | 0.602                  | 0.541                   | 0.512                   | 0.412                                         | 0.561                                                                | 0.496                                                                 | 0.410                                                                 |

Note. T statistics in parentheses; \* p<0.001

Table S7. Network Based Statistics (NBS) for testing component-level interactions between age and other individual characteristics (n=64) (regions from the Anatomical Automatic Labeling atlas)

| Variables                                         | Association | Statistics | Component threshold |                     |         |                     |         |                     |
|---------------------------------------------------|-------------|------------|---------------------|---------------------|---------|---------------------|---------|---------------------|
|                                                   |             |            | p<0.01              |                     | p<0.005 |                     | p<0.001 |                     |
|                                                   |             |            | Size                | (p <sub>NBS</sub> ) | Size    | (p <sub>NBS</sub> ) | Size    | (p <sub>NBS</sub> ) |
| Years of<br>education                             | +           | Extent     | 18                  | (0.240)             | 5       | (0.384)             | 2       | (0.270)             |
|                                                   |             | Intensity  | 5.2                 | (0.306)             | 1.3     | (0.447)             | 0.2     | (0.441)             |
| Social network<br>size                            | +           | Extent     | 3                   | (0.809)             | 1       | (0.946)             | 1       | (0.622)             |
|                                                   |             | Intensity  | 1.0                 | (0.760)             | 0.7     | (0.653)             | 0.1     | (0.517)             |
| Social network<br>embeddedness<br>(continuous)    | +           | Extent     | 2                   | (0.921)             | 1       | (0.954)             | 0       | (1.000)             |
|                                                   |             | Intensity  | 0.5                 | (0.902)             | 0.2     | (0.867)             | 0.0     | (1.000)             |
| Social network<br>embeddedness<br>(low=0, high=1) | +           | Extent     | 8                   | (0.485)             | 3       | (0.580)             | 0       | (1.000)             |
|                                                   |             | Intensity  | 2.1                 | (0.554)             | 0.6     | (0.680)             | 0.0     | (1.000)             |

Table S8. Network Based Statistics (NBS) for testing component-level associations between functional connectivity and individual characteristics (n=64) (regions from the Harvard-Oxford probabilistic atlas)

| Variables                                   | Association | Statistics | Component threshold |                     |         |                     |         |                     |
|---------------------------------------------|-------------|------------|---------------------|---------------------|---------|---------------------|---------|---------------------|
|                                             |             |            | p<0.01              |                     | p<0.005 |                     | p<0.001 |                     |
|                                             |             |            | Size                | (p <sub>NBS</sub> ) | Size    | (p <sub>NBS</sub> ) | Size    | (p <sub>NBS</sub> ) |
| Age                                         | -           | Extent     | 114                 | (0.007)             | 59      | (0.010)             | 13      | (0.008)             |
|                                             |             | Intensity  | 47.4                | (0.010)             | 24.7    | (0.009)             | 6.2     | (0.006)             |
| Years of education                          | +           | Extent     | 75                  | (0.037)             | 43      | (0.024)             | 9       | (0.023)             |
|                                             |             | Intensity  | 35.8                | (0.023)             | 20.4    | (0.018)             | 6.6     | (0.006)             |
| Social network size                         | +           | Extent     | 15                  | (0.382)             | 3       | (0.662)             | 0       | (1.000)             |
|                                             |             | Intensity  | 3.8                 | (0.481)             | 0.9     | (0.669)             | 0.0     | (1.000)             |
| Social network embeddedness (continuous)    | +           | Extent     | 58                  | (0.072)             | 25      | (0.071)             | 3       | (0.176)             |
|                                             |             | Intensity  | 20.5                | (0.089)             | 8.4     | (0.089)             | 1.0     | (0.231)             |
| Social network embeddedness (low=0, high=1) | +           | Extent     | 68                  | (0.042)             | 41      | (0.026)             | 4       | (0.094)             |
|                                             |             | Intensity  | 26.8                | (0.045)             | 12.9    | (0.042)             | 2.2     | (0.049)             |

Table S9. Network Based Statistics (NBS) for testing component-level interactions between age and other individual characteristics (n=64) (regions from the Harvard-Oxford probabilistic atlas)

| Variables                                   | Association | Statistics | Component threshold |                     |         |                     |         |                     |
|---------------------------------------------|-------------|------------|---------------------|---------------------|---------|---------------------|---------|---------------------|
|                                             |             |            | p<0.01              |                     | p<0.005 |                     | p<0.001 |                     |
|                                             |             |            | Size                | (p <sub>NBS</sub> ) | Size    | (p <sub>NBS</sub> ) | Size    | (p <sub>NBS</sub> ) |
| Years of education                          | +           | Extent     | 12                  | (0.465)             | 4       | (0.559)             | 0       | (1.000)             |
|                                             |             | Intensity  | 3.4                 | (0.525)             | 0.9     | (0.661)             | 0.0     | (1.000)             |
| Social network size                         | +           | Extent     | 9                   | (0.570)             | 4       | (0.572)             | 0       | (1.000)             |
|                                             |             | Intensity  | 2.5                 | (0.622)             | 0.7     | (0.725)             | 0.0     | (1.000)             |
| Social network embeddedness (continuous)    | +           | Extent     | 22                  | (0.275)             | 3       | (0.650)             | 1       | (0.711)             |
|                                             |             | Intensity  | 5.5                 | (0.372)             | 1.2     | (0.533)             | 0.2     | (0.524)             |
| Social network embeddedness (low=0, high=1) | +           | Extent     | 8                   | (0.577)             | 1       | (0.972)             | 1       | (0.703)             |
|                                             |             | Intensity  | 2.8                 | (0.564)             | 1.3     | (0.536)             | 0.7     | (0.253)             |

Table S10. Network Based Statistics (NBS) for testing component-level associations between functional connectivity and individual characteristics (n=64) (regions from the Dosenbach atlas)

| Variables                                   | Association | Statistics | Component threshold |                     |         |                     |         |                     |
|---------------------------------------------|-------------|------------|---------------------|---------------------|---------|---------------------|---------|---------------------|
|                                             |             |            | p<0.01              |                     | p<0.005 |                     | p<0.001 |                     |
|                                             |             |            | Size                | (p <sub>NBS</sub> ) | Size    | (p <sub>NBS</sub> ) | Size    | (p <sub>NBS</sub> ) |
| Age                                         | -           | Extent     | 117                 | (0.054)             | 59      | (0.052)             | 6       | (0.112)             |
|                                             |             | Intensity  | 43.6                | (0.062)             | 20.1    | (0.064)             | 1.2     | (0.234)             |
| Years of education                          | +           | Extent     | 74                  | (0.155)             | 34      | (0.137)             | 5       | (0.156)             |
|                                             |             | Intensity  | 24.8                | (0.181)             | 11.4    | (0.151)             | 0.3     | (0.608)             |
| Social network size                         | +           | Extent     | 9                   | (0.771)             | 4       | (0.767)             | 1       | (0.866)             |
|                                             |             | Intensity  | 2.8                 | (0.776)             | 1.5     | (0.688)             | 0.4     | (0.568)             |
| Social network embeddedness (continuous)    | +           | Extent     | 67                  | (0.187)             | 23      | (0.190)             | 2       | (0.499)             |
|                                             |             | Intensity  | 24.8                | (0.179)             | 8.2     | (0.201)             | 1.1     | (0.254)             |
| Social network embeddedness (low=0, high=1) | +           | Extent     | 62                  | (0.203)             | 12      | (0.366)             | 4       | (0.208)             |
|                                             |             | Intensity  | 25.8                | (0.163)             | 4.6     | (0.340)             | 1.1     | (0.265)             |

Table S11. Network Based Statistics (NBS) for testing component-level interactions between age and other individual characteristics (n=64) (regions from the Dosenbach atlas)

| Variables                                   | Association | Statistics | Component threshold |                     |         |                     |         |                     |
|---------------------------------------------|-------------|------------|---------------------|---------------------|---------|---------------------|---------|---------------------|
|                                             |             |            | p<0.01              |                     | p<0.005 |                     | p<0.001 |                     |
|                                             |             |            | Size                | (p <sub>NBS</sub> ) | Size    | (p <sub>NBS</sub> ) | Size    | (p <sub>NBS</sub> ) |
| Years of education                          | +           | Extent     | 18                  | (0.564)             | 7       | (0.542)             | 1       | (0.850)             |
|                                             |             | Intensity  | 6.4                 | (0.568)             | 1.9     | (0.601)             | 0.4     | (0.557)             |
| Social network size                         | +           | Extent     | 10                  | (0.730)             | 4       | (0.756)             | 2       | (0.494)             |
|                                             |             | Intensity  | 3.2                 | (0.715)             | 2.2     | (0.560)             | 0.9     | (0.294)             |
| Social network embeddedness (continuous)    | +           | Extent     | 26                  | (0.475)             | 13      | (0.337)             | 2       | (0.497)             |
|                                             |             | Intensity  | 9.9                 | (0.426)             | 4.7     | (0.332)             | 0.6     | (0.433)             |
| Social network embeddedness (low=0, high=1) | +           | Extent     | 10                  | (0.728)             | 8       | (0.507)             | 3       | (0.314)             |
|                                             |             | Intensity  | 6.1                 | (0.562)             | 3.9     | (0.383)             | 1.2     | (0.230)             |

Table S12. Brain Regions Of Interest (ROIs) in functional network components associated with age detected by Network Based Statistics (NBS) (regions from the Harvard-Oxford probabilistic atlas)

|   | Source                         | Brain ROIs |                                                      | T     | Component threshold |         |         |
|---|--------------------------------|------------|------------------------------------------------------|-------|---------------------|---------|---------|
|   |                                |            | Target                                               |       | p<0.01              | p<0.005 | p<0.001 |
| 1 | Frontal Pole (Right)           | 40         | Supramarginal Gyrus, posterior division (Left)       | -2.83 | *                   |         |         |
| 2 | Frontal Pole (Left)            | 88         | Supracalcarine Cortex (Right)                        | -2.68 | *                   |         |         |
| 2 | Frontal Pole (Left)            | 94         | Caudate (Right)                                      | -2.73 | *                   |         |         |
| 3 | Insular Cortex (Right)         | 77         | Frontal Operculum Cortex (Left)                      | -3.04 | *                   | *       |         |
| 4 | Insular Cortex (Left)          | 37         | Supramarginal Gyrus, anterior division (Right)       | -2.74 | *                   |         |         |
| 4 | Insular Cortex (Left)          | 39         | Supramarginal Gyrus, posterior division (Right)      | -2.70 | *                   |         |         |
| 4 | Insular Cortex (Left)          | 41         | Angular Gyrus (Right)                                | -2.67 | *                   |         |         |
| 4 | Insular Cortex (Left)          | 51         | Juxtapositional Lobule Cortex (Left)                 | -2.74 | *                   |         |         |
| 4 | Insular Cortex (Left)          | 56         | Cingulate Gyrus, posterior division                  | -2.89 | *                   |         |         |
| 5 | Superior Frontal Gyrus (Right) | 12         | Inferior Frontal Gyrus, pars opercularis (Left)      | -2.76 | *                   |         |         |
| 6 | Superior Frontal Gyrus (Left)  | 34         | Postcentral Gyrus (Left)                             | -3.03 | *                   | *       |         |
| 6 | Superior Frontal Gyrus (Left)  | 37         | Supramarginal Gyrus, anterior division (Right)       | -2.78 | *                   |         |         |
| 6 | Superior Frontal Gyrus (Left)  | 38         | Supramarginal Gyrus, anterior division (Left)        | -2.84 | *                   |         |         |
| 6 | Superior Frontal Gyrus (Left)  | 47         | Intracalcarine Cortex (Right)                        | -2.69 | *                   |         |         |
| 6 | Superior Frontal Gyrus (Left)  | 48         | Intracalcarine Cortex (Left)                         | -2.81 | *                   |         |         |
| 6 | Superior Frontal Gyrus (Left)  | 80         | Parietal Operculum Cortex (Right)                    | -2.82 | *                   |         |         |
| 6 | Superior Frontal Gyrus (Left)  | 81         | Parietal Operculum Cortex (Left)                     | -2.92 | *                   | *       |         |
| 6 | Superior Frontal Gyrus (Left)  | 84         | Heschl's Gyrus (Right)                               | -2.68 | *                   |         |         |
| 6 | Superior Frontal Gyrus (Left)  | 88         | Supracalcarine Cortex (Right)                        | -2.69 | *                   |         |         |
| 7 | Middle Frontal Gyrus (Right)   | 46         | Lateral Occipital Cortex, inferior division (Left)   | -2.99 | *                   |         |         |
| 7 | Middle Frontal Gyrus (Right)   | 91         | Occipital Pole (Left)                                | -3.30 | *                   |         |         |
| 8 | Middle Frontal Gyrus (Left)    | 23         | Middle Temporal Gyrus, posterior division (Right)    | -3.00 | *                   | *       |         |
| 8 | Middle Frontal Gyrus (Left)    | 25         | Middle Temporal Gyrus, temporooccipital part (Right) | -2.79 | *                   |         |         |
| 8 | Middle Frontal Gyrus (Left)    | 29         | Inferior Temporal Gyrus, posterior division (Right)  | -2.75 | *                   |         |         |



|    |                                                      |    |                                                     |       |   |   |   |
|----|------------------------------------------------------|----|-----------------------------------------------------|-------|---|---|---|
| 8  | Middle Frontal Gyrus (Left)                          | 41 | Angular Gyrus (Right)                               | -2.78 | * |   |   |
| 8  | Middle Frontal Gyrus (Left)                          | 59 | Cuneal Cortex (Left)                                | -2.78 | * |   |   |
| 8  | Middle Frontal Gyrus (Left)                          | 60 | Frontal Orbital Cortex (Right)                      | -2.81 | * |   |   |
| 8  | Middle Frontal Gyrus (Left)                          | 81 | Parietal Operculum Cortex (Left)                    | -2.73 | * |   |   |
| 8  | Middle Frontal Gyrus (Left)                          | 82 | Planum Polare (Right)                               | -3.28 | * | * |   |
| 10 | Inferior Frontal Gyrus, pars triangularis (Left)     | 82 | Planum Polare (Right)                               | -3.07 | * | * |   |
| 11 | Inferior Frontal Gyrus, pars opercularis (Right)     | 24 | Middle Temporal Gyrus, posterior division (Left)    | -2.72 | * |   |   |
| 12 | Inferior Frontal Gyrus, pars opercularis (Left)      | 39 | Supramarginal Gyrus, posterior division (Right)     | -2.83 | * |   |   |
| 12 | Inferior Frontal Gyrus, pars opercularis (Left)      | 41 | Angular Gyrus (Right)                               | -2.94 | * | * |   |
| 12 | Inferior Frontal Gyrus, pars opercularis (Left)      | 82 | Planum Polare (Right)                               | -3.38 | * | * |   |
| 12 | Inferior Frontal Gyrus, pars opercularis (Left)      | 84 | Heschl's Gyrus (Right)                              | -2.97 | * | * |   |
| 12 | Inferior Frontal Gyrus, pars opercularis (Left)      | 89 | Supracalcarine Cortex (Left)                        | -2.95 | * | * |   |
| 13 | Precentral Gyrus (Right)                             | 29 | Inferior Temporal Gyrus, posterior division (Right) | -4.72 | * | * | * |
| 14 | Precentral Gyrus (Left)                              | 23 | Middle Temporal Gyrus, posterior division (Right)   | -2.71 | * |   |   |
| 14 | Precentral Gyrus (Left)                              | 29 | Inferior Temporal Gyrus, posterior division (Right) | -4.92 | * | * | * |
| 14 | Precentral Gyrus (Left)                              | 62 | Parahippocampal Gyrus, anterior division (Right)    | -2.85 | * |   |   |
| 14 | Precentral Gyrus (Left)                              | 63 | Parahippocampal Gyrus, anterior division (Left)     | -2.90 | * |   |   |
| 14 | Precentral Gyrus (Left)                              | 81 | Parietal Operculum Cortex (Left)                    | -2.79 | * |   |   |
| 16 | Temporal Pole (Left)                                 | 71 | Temporal Fusiform Cortex, posterior division (Left) | -2.76 | * |   |   |
| 19 | Superior Temporal Gyrus, posterior division (Right)  | 51 | Juxtapositional Lobule Cortex (Left)                | -2.97 | * | * |   |
| 23 | Middle Temporal Gyrus, posterior division (Right)    | 51 | Juxtapositional Lobule Cortex (Left)                | -3.55 | * | * | * |
| 24 | Middle Temporal Gyrus, posterior division (Left)     | 84 | Heschl's Gyrus (Right)                              | -2.69 | * |   |   |
| 25 | Middle Temporal Gyrus, temporooccipital part (Right) | 53 | Paracingulate Gyrus (Right)                         | -3.57 | * | * |   |
| 25 | Middle Temporal Gyrus, temporooccipital part (Right) | 54 | Paracingulate Gyrus (Left)                          | -3.46 | * | * |   |

|    |                                                     |    |                                                  |       |   |   |   |
|----|-----------------------------------------------------|----|--------------------------------------------------|-------|---|---|---|
| 26 | Middle Temporal Gyrus, temporooccipital part (Left) | 53 | Paracingulate Gyrus (Right)                      | -3.50 | * | * |   |
| 26 | Middle Temporal Gyrus, temporooccipital part (Left) | 96 | Putamen (Right)                                  | -3.12 | * | * |   |
| 29 | Inferior Temporal Gyrus, posterior division (Right) | 33 | Postcentral Gyrus (Right)                        | -3.45 | * | * |   |
| 29 | Inferior Temporal Gyrus, posterior division (Right) | 34 | Postcentral Gyrus (Left)                         | -4.40 | * | * | * |
| 29 | Inferior Temporal Gyrus, posterior division (Right) | 36 | Superior Parietal Lobule (Left)                  | -2.82 | * |   |   |
| 29 | Inferior Temporal Gyrus, posterior division (Right) | 50 | Juxtapositional Lobule Cortex (Right)            | -3.87 | * | * | * |
| 29 | Inferior Temporal Gyrus, posterior division (Right) | 51 | Juxtapositional Lobule Cortex (Left)             | -3.90 | * | * | * |
| 29 | Inferior Temporal Gyrus, posterior division (Right) | 79 | Central Opercular Cortex (Left)                  | -2.97 | * | * |   |
| 30 | Inferior Temporal Gyrus, posterior division (Left)  | 37 | Supramarginal Gyrus, anterior division (Right)   | -2.90 | * |   |   |
| 30 | Inferior Temporal Gyrus, posterior division (Left)  | 50 | Juxtapositional Lobule Cortex (Right)            | -2.98 | * | * |   |
| 34 | Postcentral Gyrus (Left)                            | 63 | Parahippocampal Gyrus, anterior division (Left)  | -2.82 | * |   |   |
| 36 | Superior Parietal Lobule (Left)                     | 63 | Parahippocampal Gyrus, anterior division (Left)  | -3.53 | * | * |   |
| 36 | Superior Parietal Lobule (Left)                     | 78 | Central Opercular Cortex (Right)                 | -2.75 | * |   |   |
| 37 | Supramarginal Gyrus, anterior division (Right)      | 62 | Parahippocampal Gyrus, anterior division (Right) | -2.83 | * |   |   |
| 37 | Supramarginal Gyrus, anterior division (Right)      | 77 | Frontal Operculum Cortex (Left)                  | -3.93 | * | * | * |
| 37 | Supramarginal Gyrus, anterior division (Right)      | 78 | Central Opercular Cortex (Right)                 | -3.58 | * | * | * |
| 37 | Supramarginal Gyrus, anterior division (Right)      | 79 | Central Opercular Cortex (Left)                  | -3.11 | * | * |   |
| 37 | Supramarginal Gyrus, anterior division (Right)      | 83 | Planum Polare (Left)                             | -3.91 | * | * | * |
| 38 | Supramarginal Gyrus, anterior division (Left)       | 77 | Frontal Operculum Cortex (Left)                  | -2.91 | * |   |   |
| 39 | Supramarginal Gyrus, posterior division (Right)     | 77 | Frontal Operculum Cortex (Left)                  | -3.15 | * | * |   |
| 40 | Supramarginal Gyrus, posterior division (Left)      | 53 | Paracingulate Gyrus (Right)                      | -3.28 | * | * |   |
| 40 | Supramarginal Gyrus, posterior division (Left)      | 55 | Cingulate Gyrus, anterior division               | -2.84 | * |   |   |
| 41 | Angular Gyrus (Right)                               | 76 | Frontal Operculum Cortex (Right)                 | -2.94 | * | * |   |
| 42 | Angular Gyrus (Left)                                | 53 | Paracingulate Gyrus (Right)                      | -3.50 | * | * |   |
| 42 | Angular Gyrus (Left)                                | 55 | Cingulate Gyrus, anterior division               | -2.95 | * | * |   |

|    |                                       |     |                                                      |       |   |   |   |
|----|---------------------------------------|-----|------------------------------------------------------|-------|---|---|---|
| 42 | Angular Gyrus (Left)                  | 94  | Caudate (Right)                                      | -2.84 | * |   |   |
| 42 | Angular Gyrus (Left)                  | 96  | Putamen (Right)                                      | -3.42 | * | * |   |
| 42 | Angular Gyrus (Left)                  | 99  | Pallidum (Left)                                      | -3.04 | * | * |   |
| 48 | Intracalcarine Cortex (Left)          | 54  | Paracingulate Gyrus (Left)                           | -3.06 | * | * |   |
| 48 | Intracalcarine Cortex (Left)          | 63  | Parahippocampal Gyrus, anterior division (Left)      | -2.78 | * |   |   |
| 50 | Juxtapositional Lobule Cortex (Right) | 62  | Parahippocampal Gyrus, anterior division (Right)     | -2.96 | * | * |   |
| 50 | Juxtapositional Lobule Cortex (Right) | 63  | Parahippocampal Gyrus, anterior division (Left)      | -3.05 | * | * |   |
| 50 | Juxtapositional Lobule Cortex (Right) | 82  | Planum Polare (Right)                                | -2.90 | * |   |   |
| 50 | Juxtapositional Lobule Cortex (Right) | 83  | Planum Polare (Left)                                 | -3.56 | * | * | * |
| 50 | Juxtapositional Lobule Cortex (Right) | 87  | Planum Temporale (Left)                              | -3.15 | * | * |   |
| 51 | Juxtapositional Lobule Cortex (Left)  | 62  | Parahippocampal Gyrus, anterior division (Right)     | -3.48 | * | * | * |
| 51 | Juxtapositional Lobule Cortex (Left)  | 63  | Parahippocampal Gyrus, anterior division (Left)      | -3.47 | * | * |   |
| 51 | Juxtapositional Lobule Cortex (Left)  | 67  | Lingual Gyrus (Left)                                 | -2.84 | * |   |   |
| 51 | Juxtapositional Lobule Cortex (Left)  | 70  | Temporal Fusiform Cortex, posterior division (Right) | -2.91 | * |   |   |
| 51 | Juxtapositional Lobule Cortex (Left)  | 82  | Planum Polare (Right)                                | -3.76 | * | * | * |
| 51 | Juxtapositional Lobule Cortex (Left)  | 83  | Planum Polare (Left)                                 | -3.05 | * | * |   |
| 51 | Juxtapositional Lobule Cortex (Left)  | 84  | Heschl's Gyrus (Right)                               | -3.43 | * | * |   |
| 51 | Juxtapositional Lobule Cortex (Left)  | 85  | Heschl's Gyrus (Left)                                | -3.72 | * | * | * |
| 51 | Juxtapositional Lobule Cortex (Left)  | 87  | Planum Temporale (Left)                              | -2.84 | * |   |   |
| 53 | Paracingulate Gyrus (Right)           | 91  | Occipital Pole (Left)                                | -2.75 | * |   |   |
| 54 | Paracingulate Gyrus (Left)            | 90  | Occipital Pole (Right)                               | -2.81 | * |   |   |
| 54 | Paracingulate Gyrus (Left)            | 100 | Hippocampus (Right)                                  | -2.94 | * | * |   |
| 55 | Cingulate Gyrus, anterior division    | 56  | Cingulate Gyrus, posterior division                  | -2.77 | * |   |   |
| 55 | Cingulate Gyrus, anterior division    | 61  | Frontal Orbital Cortex (Left)                        | -2.82 | * |   |   |
| 55 | Cingulate Gyrus, anterior division    | 63  | Parahippocampal Gyrus, anterior division (Left)      | -2.84 | * |   |   |
| 55 | Cingulate Gyrus, anterior division    | 77  | Frontal Operculum Cortex (Left)                      | -2.83 | * |   |   |
| 56 | Cingulate Gyrus, posterior division   | 76  | Frontal Operculum Cortex (Right)                     | -3.40 | * | * |   |
| 56 | Cingulate Gyrus, posterior division   | 96  | Putamen (Right)                                      | -3.17 | * | * |   |
| 58 | Cuneal Cortex (Right)                 | 63  | Parahippocampal Gyrus, anterior division (Left)      | -3.01 | * | * |   |

|    |                                                     |    |                                                 |       |   |   |
|----|-----------------------------------------------------|----|-------------------------------------------------|-------|---|---|
| 58 | Cuneal Cortex (Right)                               | 82 | Planum Polare (Right)                           | -3.18 | * | * |
| 59 | Cuneal Cortex (Left)                                | 63 | Parahippocampal Gyrus, anterior division (Left) | -3.45 | * | * |
| 61 | Frontal Orbital Cortex (Left)                       | 82 | Planum Polare (Right)                           | -3.27 | * | * |
| 61 | Frontal Orbital Cortex (Left)                       | 94 | Caudate (Right)                                 | -3.26 | * | * |
| 63 | Parahippocampal Gyrus, anterior division (Left)     | 96 | Putamen (Right)                                 | -2.84 | * |   |
| 63 | Parahippocampal Gyrus, anterior division (Left)     | 98 | Pallidum (Right)                                | -3.30 | * | * |
| 63 | Parahippocampal Gyrus, anterior division (Left)     | 99 | Pallidum (Left)                                 | -2.86 | * |   |
| 71 | Temporal Fusiform Cortex, posterior division (Left) | 98 | Pallidum (Right)                                | -2.95 | * | * |
| 77 | Frontal Operculum Cortex (Left)                     | 82 | Planum Polare (Right)                           | -3.07 | * | * |
| 77 | Frontal Operculum Cortex (Left)                     | 84 | Heschl's Gyrus (Right)                          | -3.04 | * | * |
| 77 | Frontal Operculum Cortex (Left)                     | 89 | Supracalcarine Cortex (Left)                    | -2.67 | * |   |
| 79 | Central Opercular Cortex (Left)                     | 84 | Heschl's Gyrus (Right)                          | -2.81 | * |   |

---

Table S13. Brain Regions Of Interest (ROIs) in functional network components associated with years of education detected by Network Based Statistics (NBS) (regions from the Harvard-Oxford probabilistic atlas)

|    | Source                                             | Brain ROIs |                                                       | T    | Component threshold |         |         |
|----|----------------------------------------------------|------------|-------------------------------------------------------|------|---------------------|---------|---------|
|    |                                                    |            | Target                                                |      | p<0.01              | p<0.005 | p<0.001 |
| 3  | Insular Cortex (Right)                             | 80         | Parietal Operculum Cortex (Right)                     | 3.15 | *                   | *       |         |
| 6  | Superior Frontal Gyrus (Left)                      | 23         | Middle Temporal Gyrus, posterior division (Right)     | 2.95 | *                   |         |         |
| 6  | Superior Frontal Gyrus (Left)                      | 29         | Inferior Temporal Gyrus, posterior division (Right)   | 3.83 | *                   |         |         |
| 6  | Superior Frontal Gyrus (Left)                      | 32         | Inferior Temporal Gyrus, temporooccipital part (Left) | 2.71 | *                   |         |         |
| 13 | Precentral Gyrus (Right)                           | 14         | Precentral Gyrus (Left)                               | 3.20 | *                   | *       |         |
| 13 | Precentral Gyrus (Right)                           | 33         | Postcentral Gyrus (Right)                             | 3.28 | *                   | *       |         |
| 13 | Precentral Gyrus (Right)                           | 80         | Parietal Operculum Cortex (Right)                     | 3.29 | *                   | *       |         |
| 13 | Precentral Gyrus (Right)                           | 85         | Heschl's Gyrus (Left)                                 | 2.74 | *                   |         |         |
| 14 | Precentral Gyrus (Left)                            | 19         | Superior Temporal Gyrus, posterior division (Right)   | 3.06 | *                   | *       |         |
| 14 | Precentral Gyrus (Left)                            | 32         | Inferior Temporal Gyrus, temporooccipital part (Left) | 3.12 | *                   | *       |         |
| 14 | Precentral Gyrus (Left)                            | 33         | Postcentral Gyrus (Right)                             | 2.77 | *                   |         |         |
| 14 | Precentral Gyrus (Left)                            | 35         | Superior Parietal Lobule (Right)                      | 2.76 | *                   |         |         |
| 14 | Precentral Gyrus (Left)                            | 78         | Central Opercular Cortex (Right)                      | 2.80 | *                   |         |         |
| 14 | Precentral Gyrus (Left)                            | 80         | Parietal Operculum Cortex (Right)                     | 2.96 | *                   | *       |         |
| 14 | Precentral Gyrus (Left)                            | 86         | Planum Temporale (Right)                              | 2.84 | *                   |         |         |
| 17 | Superior Temporal Gyrus, anterior division (Right) | 46         | Lateral Occipital Cortex, inferior division (Left)    | 2.75 | *                   |         |         |
| 17 | Superior Temporal Gyrus, anterior division (Right) | 81         | Parietal Operculum Cortex (Left)                      | 2.82 | *                   |         |         |
| 17 | Superior Temporal Gyrus, anterior division (Right) | 88         | Supracalcarine Cortex (Right)                         | 3.07 | *                   | *       |         |
| 18 | Superior Temporal Gyrus, anterior division (Left)  | 63         | Parahippocampal Gyrus, anterior division (Left)       | 2.77 | *                   |         |         |
| 18 | Superior Temporal Gyrus, anterior division (Left)  | 66         | Lingual Gyrus (Right)                                 | 3.00 | *                   | *       |         |
| 18 | Superior Temporal Gyrus, anterior division (Left)  | 67         | Lingual Gyrus (Left)                                  | 3.72 | *                   | *       | *       |

|    |                                                     |     |                                                       |      |   |   |   |
|----|-----------------------------------------------------|-----|-------------------------------------------------------|------|---|---|---|
| 18 | Superior Temporal Gyrus, anterior division (Left)   | 101 | Hippocampus (Left)                                    | 2.74 | * |   |   |
| 19 | Superior Temporal Gyrus, posterior division (Right) | 26  | Middle Temporal Gyrus, temporooccipital part (Left)   | 3.21 | * | * |   |
| 19 | Superior Temporal Gyrus, posterior division (Right) | 32  | Inferior Temporal Gyrus, temporooccipital part (Left) | 3.05 | * | * |   |
| 19 | Superior Temporal Gyrus, posterior division (Right) | 46  | Lateral Occipital Cortex, inferior division (Left)    | 3.35 | * | * |   |
| 19 | Superior Temporal Gyrus, posterior division (Right) | 47  | Intracalcarine Cortex (Right)                         | 3.84 | * | * | * |
| 19 | Superior Temporal Gyrus, posterior division (Right) | 48  | Intracalcarine Cortex (Left)                          | 5.26 | * | * | * |
| 19 | Superior Temporal Gyrus, posterior division (Right) | 50  | Juxtapositional Lobule Cortex (Right)                 | 2.72 | * |   |   |
| 19 | Superior Temporal Gyrus, posterior division (Right) | 58  | Cuneal Cortex (Right)                                 | 3.83 | * | * | * |
| 19 | Superior Temporal Gyrus, posterior division (Right) | 59  | Cuneal Cortex (Left)                                  | 4.26 | * | * | * |
| 19 | Superior Temporal Gyrus, posterior division (Right) | 61  | Frontal Orbital Cortex (Left)                         | 3.26 | * | * |   |
| 19 | Superior Temporal Gyrus, posterior division (Right) | 66  | Lingual Gyrus (Right)                                 | 2.75 | * |   |   |
| 19 | Superior Temporal Gyrus, posterior division (Right) | 67  | Lingual Gyrus (Left)                                  | 4.72 | * | * | * |
| 19 | Superior Temporal Gyrus, posterior division (Right) | 73  | Temporal Occipital Fusiform Cortex (Left)             | 3.50 | * | * | * |
| 19 | Superior Temporal Gyrus, posterior division (Right) | 74  | Occipital Fusiform Gyrus (Right)                      | 3.38 | * | * |   |
| 19 | Superior Temporal Gyrus, posterior division (Right) | 79  | Central Opercular Cortex (Left)                       | 3.09 | * | * |   |
| 19 | Superior Temporal Gyrus, posterior division (Right) | 81  | Parietal Operculum Cortex (Left)                      | 2.96 | * | * |   |
| 19 | Superior Temporal Gyrus, posterior division (Right) | 87  | Planum Temporale (Left)                               | 2.99 | * | * |   |
| 19 | Superior Temporal Gyrus, posterior division (Right) | 88  | Supracalcarine Cortex (Right)                         | 4.74 | * | * | * |
| 19 | Superior Temporal Gyrus, posterior division         | 89  | Supracalcarine Cortex (Left)                          | 3.95 | * | * | * |

|    |                                                       |    |                                                     |      |   |   |  |
|----|-------------------------------------------------------|----|-----------------------------------------------------|------|---|---|--|
|    | (Right)                                               |    |                                                     |      |   |   |  |
| 20 | Superior Temporal Gyrus, posterior division (Left)    | 47 | Intracalcarine Cortex (Right)                       | 2.67 | * |   |  |
| 20 | Superior Temporal Gyrus, posterior division (Left)    | 48 | Intracalcarine Cortex (Left)                        | 2.76 | * |   |  |
| 20 | Superior Temporal Gyrus, posterior division (Left)    | 63 | Parahippocampal Gyrus, anterior division (Left)     | 3.04 | * | * |  |
| 20 | Superior Temporal Gyrus, posterior division (Left)    | 67 | Lingual Gyrus (Left)                                | 3.04 | * | * |  |
| 20 | Superior Temporal Gyrus, posterior division (Left)    | 88 | Supracalcarine Cortex (Right)                       | 2.88 | * |   |  |
| 25 | Middle Temporal Gyrus, temporooccipital part (Right)  | 28 | Inferior Temporal Gyrus, anterior division (Left)   | 2.73 | * |   |  |
| 28 | Inferior Temporal Gyrus, anterior division (Left)     | 44 | Lateral Occipital Cortex, superior division (Left)  | 2.74 | * |   |  |
| 28 | Inferior Temporal Gyrus, anterior division (Left)     | 45 | Lateral Occipital Cortex, inferior division (Right) | 2.84 | * |   |  |
| 32 | Inferior Temporal Gyrus, temporooccipital part (Left) | 35 | Superior Parietal Lobule (Right)                    | 2.77 | * |   |  |
| 32 | Inferior Temporal Gyrus, temporooccipital part (Left) | 36 | Superior Parietal Lobule (Left)                     | 2.93 | * | * |  |
| 32 | Inferior Temporal Gyrus, temporooccipital part (Left) | 50 | Juxtapositional Lobule Cortex (Right)               | 3.20 | * | * |  |
| 32 | Inferior Temporal Gyrus, temporooccipital part (Left) | 51 | Juxtapositional Lobule Cortex (Left)                | 3.37 | * | * |  |
| 33 | Postcentral Gyrus (Right)                             | 78 | Central Opercular Cortex (Right)                    | 2.71 | * |   |  |
| 33 | Postcentral Gyrus (Right)                             | 79 | Central Opercular Cortex (Left)                     | 2.72 | * |   |  |
| 33 | Postcentral Gyrus (Right)                             | 85 | Heschl's Gyrus (Left)                               | 3.31 | * | * |  |
| 33 | Postcentral Gyrus (Right)                             | 86 | Planum Temporale (Right)                            | 2.82 | * |   |  |
| 35 | Superior Parietal Lobule (Right)                      | 85 | Heschl's Gyrus (Left)                               | 3.01 | * | * |  |
| 35 | Superior Parietal Lobule (Right)                      | 86 | Planum Temporale (Right)                            | 2.76 | * |   |  |
| 45 | Lateral Occipital Cortex, inferior division (Right)   | 69 | Temporal Fusiform Cortex, anterior division (Left)  | 3.83 | * | * |  |
| 58 | Cuneal Cortex (Right)                                 | 63 | Parahippocampal Gyrus, anterior division (Left)     | 3.31 | * | * |  |
| 58 | Cuneal Cortex (Right)                                 | 69 | Temporal Fusiform Cortex, anterior division (Left)  | 3.00 | * | * |  |

|    |                                                     |     |                                                 |      |   |   |
|----|-----------------------------------------------------|-----|-------------------------------------------------|------|---|---|
| 59 | Cuneal Cortex (Left)                                | 63  | Parahippocampal Gyrus, anterior division (Left) | 3.06 | * | * |
| 63 | Parahippocampal Gyrus, anterior division (Left)     | 66  | Lingual Gyrus (Right)                           | 3.11 | * | * |
| 63 | Parahippocampal Gyrus, anterior division (Left)     | 67  | Lingual Gyrus (Left)                            | 3.46 | * | * |
| 63 | Parahippocampal Gyrus, anterior division (Left)     | 75  | Occipital Fusiform Gyrus (Left)                 | 2.91 | * |   |
| 63 | Parahippocampal Gyrus, anterior division (Left)     | 99  | Pallidum (Left)                                 | 2.92 | * | * |
| 68 | Temporal Fusiform Cortex, anterior division (Right) | 88  | Supracalcarine Cortex (Right)                   | 2.74 | * |   |
| 69 | Temporal Fusiform Cortex, anterior division (Left)  | 75  | Occipital Fusiform Gyrus (Left)                 | 2.69 | * |   |
| 69 | Temporal Fusiform Cortex, anterior division (Left)  | 88  | Supracalcarine Cortex (Right)                   | 2.74 | * |   |
| 69 | Temporal Fusiform Cortex, anterior division (Left)  | 91  | Occipital Pole (Left)                           | 3.35 | * | * |
| 78 | Central Opercular Cortex (Right)                    | 80  | Parietal Operculum Cortex (Right)               | 2.71 | * |   |
| 80 | Parietal Operculum Cortex (Right)                   | 82  | Planum Polare (Right)                           | 3.76 | * | * |
| 80 | Parietal Operculum Cortex (Right)                   | 85  | Heschl's Gyrus (Left)                           | 3.01 | * | * |
| 80 | Parietal Operculum Cortex (Right)                   | 86  | Planum Temporale (Right)                        | 2.81 | * |   |
| 99 | Pallidum (Left)                                     | 100 | Hippocampus (Right)                             | 2.81 | * |   |

---



Table S14. Brain Regions Of Interest (ROIs) in functional network components associated with social network embeddedness (low=0, high=1) detected by Network Based Statistics (NBS) (regions from the Harvard-Oxford probabilistic atlas)

|    | Source                                            | Brain ROIs |                                                        | T    | Component threshold |         |         |
|----|---------------------------------------------------|------------|--------------------------------------------------------|------|---------------------|---------|---------|
|    |                                                   |            | Target                                                 |      | p<0.01              | p<0.005 | p<0.001 |
| 3  | Insular Cortex (Right)                            | 33         | Postcentral Gyrus (Right)                              | 2.77 | *                   |         |         |
| 3  | Insular Cortex (Right)                            | 35         | Superior Parietal Lobule (Right)                       | 2.81 | *                   |         |         |
| 3  | Insular Cortex (Right)                            | 43         | Lateral Occipital Cortex, superior division (Right)    | 2.95 | *                   | *       |         |
| 3  | Insular Cortex (Right)                            | 57         | Precuneous Cortex                                      | 3.08 | *                   | *       |         |
| 3  | Insular Cortex (Right)                            | 72         | Temporal Occipital Fusiform Cortex (Right)             | 2.81 | *                   |         |         |
| 4  | Insular Cortex (Left)                             | 57         | Precuneous Cortex                                      | 3.45 | *                   | *       |         |
| 5  | Superior Frontal Gyrus (Right)                    | 64         | Parahippocampal Gyrus, posterior division (Right)      | 2.67 | *                   |         |         |
| 5  | Superior Frontal Gyrus (Right)                    | 102        | Amygdala (Right)                                       | 2.90 | *                   |         |         |
| 7  | Middle Frontal Gyrus (Right)                      | 33         | Postcentral Gyrus (Right)                              | 3.01 | *                   |         |         |
| 7  | Middle Frontal Gyrus (Right)                      | 39         | Supramarginal Gyrus, posterior division (Right)        | 2.73 | *                   |         |         |
| 9  | Inferior Frontal Gyrus, pars triangularis (Right) | 31         | Inferior Temporal Gyrus, temporooccipital part (Right) | 2.92 | *                   | *       |         |
| 9  | Inferior Frontal Gyrus, pars triangularis (Right) | 37         | Supramarginal Gyrus, anterior division (Right)         | 2.84 | *                   |         |         |
| 9  | Inferior Frontal Gyrus, pars triangularis (Right) | 43         | Lateral Occipital Cortex, superior division (Right)    | 3.94 | *                   | *       | *       |
| 9  | Inferior Frontal Gyrus, pars triangularis (Right) | 45         | Lateral Occipital Cortex, inferior division (Right)    | 2.78 | *                   |         |         |
| 9  | Inferior Frontal Gyrus, pars triangularis (Right) | 46         | Lateral Occipital Cortex, inferior division (Left)     | 3.00 | *                   | *       |         |
| 9  | Inferior Frontal Gyrus, pars triangularis (Right) | 57         | Precuneous Cortex                                      | 2.75 | *                   |         |         |
| 9  | Inferior Frontal Gyrus, pars triangularis (Right) | 58         | Cuneal Cortex (Right)                                  | 3.40 | *                   | *       |         |
| 9  | Inferior Frontal Gyrus, pars triangularis (Right) | 59         | Cuneal Cortex (Left)                                   | 2.84 | *                   |         |         |
| 9  | Inferior Frontal Gyrus, pars triangularis (Right) | 66         | Lingual Gyrus (Right)                                  | 2.72 | *                   |         |         |
| 9  | Inferior Frontal Gyrus, pars triangularis (Right) | 72         | Temporal Occipital Fusiform Cortex (Right)             | 3.24 | *                   | *       |         |
| 9  | Inferior Frontal Gyrus, pars triangularis (Right) | 73         | Temporal Occipital Fusiform Cortex (Left)              | 2.76 | *                   |         |         |
| 9  | Inferior Frontal Gyrus, pars triangularis (Right) | 88         | Supracalcarine Cortex (Right)                          | 2.83 | *                   |         |         |
| 10 | Inferior Frontal Gyrus, pars triangularis (Left)  | 98         | Pallidum (Right)                                       | 2.74 | *                   |         |         |

|    |                                                        |    |                                                        |      |   |   |   |
|----|--------------------------------------------------------|----|--------------------------------------------------------|------|---|---|---|
| 11 | Inferior Frontal Gyrus, pars opercularis (Right)       | 31 | Inferior Temporal Gyrus, temporooccipital part (Right) | 2.95 | * | * |   |
| 11 | Inferior Frontal Gyrus, pars opercularis (Right)       | 32 | Inferior Temporal Gyrus, temporooccipital part (Left)  | 3.02 | * | * |   |
| 11 | Inferior Frontal Gyrus, pars opercularis (Right)       | 35 | Superior Parietal Lobule (Right)                       | 3.09 | * | * |   |
| 11 | Inferior Frontal Gyrus, pars opercularis (Right)       | 43 | Lateral Occipital Cortex, superior division (Right)    | 2.95 | * | * |   |
| 11 | Inferior Frontal Gyrus, pars opercularis (Right)       | 48 | Intracalcarine Cortex (Left)                           | 2.92 | * | * |   |
| 11 | Inferior Frontal Gyrus, pars opercularis (Right)       | 50 | Juxtapositional Lobule Cortex (Right)                  | 2.83 | * |   |   |
| 11 | Inferior Frontal Gyrus, pars opercularis (Right)       | 64 | Parahippocampal Gyrus, posterior division (Right)      | 2.88 | * |   |   |
| 11 | Inferior Frontal Gyrus, pars opercularis (Right)       | 88 | Supracalcarine Cortex (Right)                          | 2.84 | * |   |   |
| 11 | Inferior Frontal Gyrus, pars opercularis (Right)       | 89 | Supracalcarine Cortex (Left)                           | 3.25 | * | * |   |
| 12 | Inferior Frontal Gyrus, pars opercularis (Left)        | 72 | Temporal Occipital Fusiform Cortex (Right)             | 3.69 | * | * |   |
| 12 | Inferior Frontal Gyrus, pars opercularis (Left)        | 98 | Pallidum (Right)                                       | 2.68 | * |   |   |
| 31 | Inferior Temporal Gyrus, temporooccipital part (Right) | 55 | Cingulate Gyrus, anterior division                     | 3.03 | * | * |   |
| 33 | Postcentral Gyrus (Right)                              | 55 | Cingulate Gyrus, anterior division                     | 2.77 | * |   |   |
| 35 | Superior Parietal Lobule (Right)                       | 55 | Cingulate Gyrus, anterior division                     | 4.11 | * | * | * |
| 35 | Superior Parietal Lobule (Right)                       | 95 | Caudate (Left)                                         | 2.93 | * | * |   |
| 36 | Superior Parietal Lobule (Left)                        | 55 | Cingulate Gyrus, anterior division                     | 2.87 | * |   |   |
| 36 | Superior Parietal Lobule (Left)                        | 94 | Caudate (Right)                                        | 3.32 | * | * |   |
| 36 | Superior Parietal Lobule (Left)                        | 95 | Caudate (Left)                                         | 3.51 | * | * |   |
| 43 | Lateral Occipital Cortex, superior division (Right)    | 53 | Paracingulate Gyrus (Right)                            | 2.98 | * | * |   |
| 43 | Lateral Occipital Cortex, superior division (Right)    | 54 | Paracingulate Gyrus (Left)                             | 2.72 | * |   |   |
| 43 | Lateral Occipital Cortex, superior division (Right)    | 55 | Cingulate Gyrus, anterior division                     | 4.35 | * | * | * |
| 43 | Lateral Occipital Cortex, superior division (Right)    | 94 | Caudate (Right)                                        | 2.92 | * | * |   |
| 43 | Lateral Occipital Cortex, superior division (Right)    | 95 | Caudate (Left)                                         | 2.73 | * |   |   |
| 44 | Lateral Occipital Cortex, superior division (Left)     | 53 | Paracingulate Gyrus (Right)                            | 2.79 | * |   |   |

|    |                                                    |    |                                                     |      |   |   |   |
|----|----------------------------------------------------|----|-----------------------------------------------------|------|---|---|---|
| 44 | Lateral Occipital Cortex, superior division (Left) | 55 | Cingulate Gyrus, anterior division                  | 3.19 | * | * |   |
| 46 | Lateral Occipital Cortex, inferior division (Left) | 76 | Frontal Operculum Cortex (Right)                    | 3.32 | * | * |   |
| 47 | Intracalcarine Cortex (Right)                      | 76 | Frontal Operculum Cortex (Right)                    | 2.71 | * |   |   |
| 49 | Frontal Medial Cortex                              | 95 | Caudate (Left)                                      | 3.00 | * | * |   |
| 55 | Cingulate Gyrus, anterior division                 | 57 | Precuneous Cortex                                   | 3.63 | * | * | * |
| 55 | Cingulate Gyrus, anterior division                 | 72 | Temporal Occipital Fusiform Cortex (Right)          | 3.12 | * | * |   |
| 57 | Precuneous Cortex                                  | 76 | Frontal Operculum Cortex (Right)                    | 3.19 | * | * |   |
| 57 | Precuneous Cortex                                  | 94 | Caudate (Right)                                     | 3.44 | * | * |   |
| 57 | Precuneous Cortex                                  | 95 | Caudate (Left)                                      | 2.87 | * |   |   |
| 58 | Cuneal Cortex (Right)                              | 76 | Frontal Operculum Cortex (Right)                    | 3.30 | * | * |   |
| 59 | Cuneal Cortex (Left)                               | 76 | Frontal Operculum Cortex (Right)                    | 3.57 | * | * |   |
| 60 | Frontal Orbital Cortex (Right)                     | 68 | Temporal Fusiform Cortex, anterior division (Right) | 2.70 | * |   |   |
| 60 | Frontal Orbital Cortex (Right)                     | 78 | Central Opercular Cortex (Right)                    | 2.95 | * | * |   |
| 66 | Lingual Gyrus (Right)                              | 76 | Frontal Operculum Cortex (Right)                    | 3.15 | * | * |   |
| 67 | Lingual Gyrus (Left)                               | 76 | Frontal Operculum Cortex (Right)                    | 2.96 | * | * |   |
| 72 | Temporal Occipital Fusiform Cortex (Right)         | 76 | Frontal Operculum Cortex (Right)                    | 3.05 | * | * |   |
| 72 | Temporal Occipital Fusiform Cortex (Right)         | 78 | Central Opercular Cortex (Right)                    | 2.99 | * | * |   |
| 72 | Temporal Occipital Fusiform Cortex (Right)         | 79 | Central Opercular Cortex (Left)                     | 3.31 | * | * |   |
| 73 | Temporal Occipital Fusiform Cortex (Left)          | 76 | Frontal Operculum Cortex (Right)                    | 3.25 | * | * |   |
| 75 | Occipital Fusiform Gyrus (Left)                    | 76 | Frontal Operculum Cortex (Right)                    | 3.20 | * | * |   |
| 76 | Frontal Operculum Cortex (Right)                   | 88 | Supracalcarine Cortex (Right)                       | 3.02 | * | * |   |

---



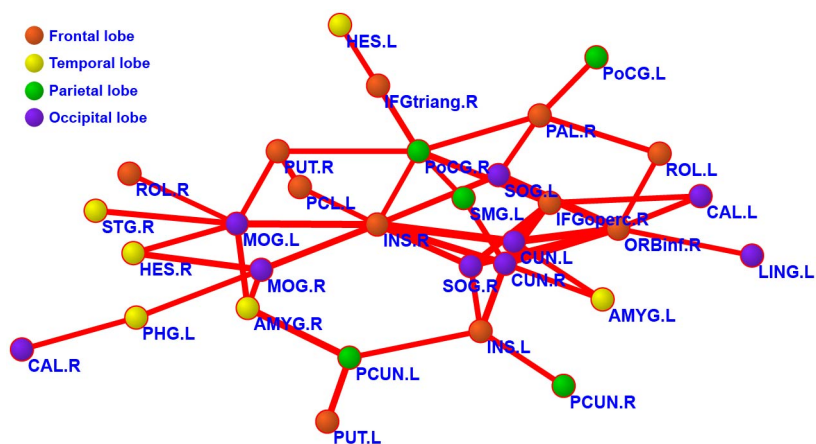

Figure S2. Network component associated with social network embeddedness (continuous) ( $p < 0.01$ , regions from the Anatomical Automatic Labeling atlas).

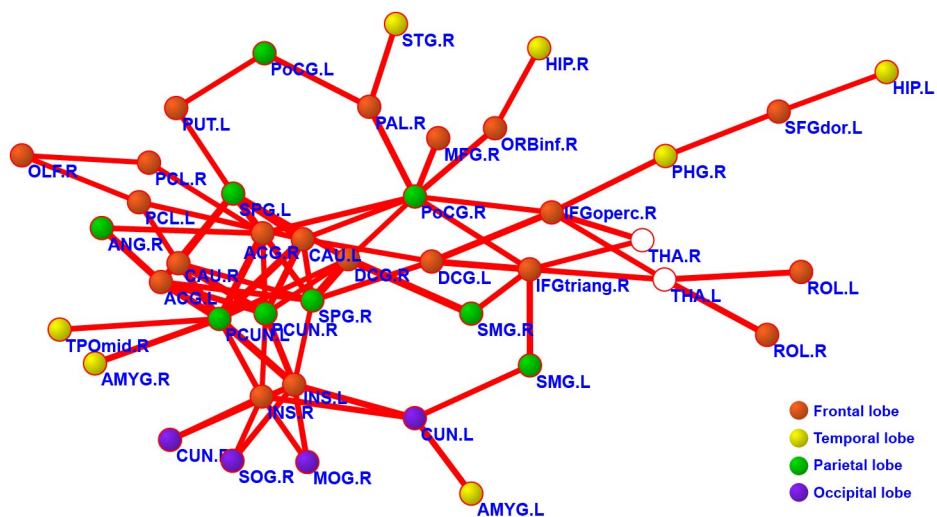

Figure S3. Network component associated with social network embeddedness (low=0, high=1) ( $p < 0.01$ , regions from the Anatomical Automatic Labeling atlas).

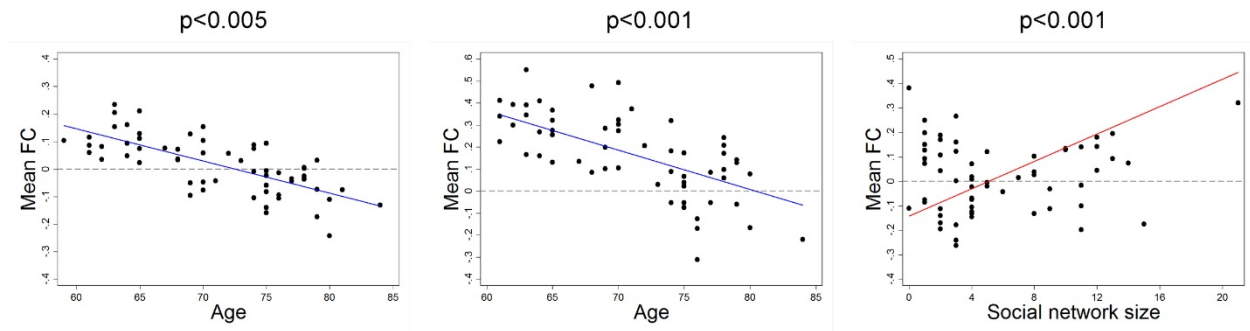

Figure S4. Component-level associations between functional connectivity and age/social network size. Outliers ( $|DFBETA| > 0.25$ ) were excluded ( $n=61, 59,$  and  $61,$  respectively) (regions from the Anatomical Automatic Labeling atlas).

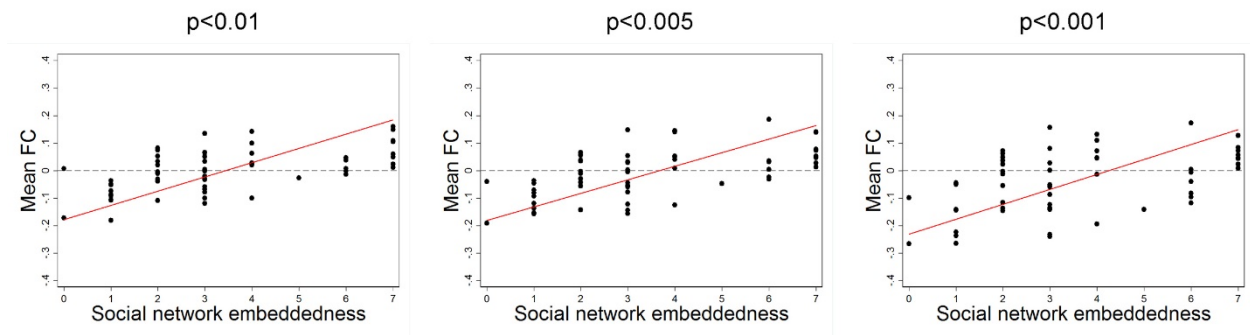

Figure S5. Component-level association between functional connectivity and social network embeddedness (continuous). Outliers ( $|DFBETA| > 0.25$ ) were excluded ( $n=58, 60,$  and  $58,$  respectively) (regions from the Anatomical Automatic Labeling atlas).

(a) Age

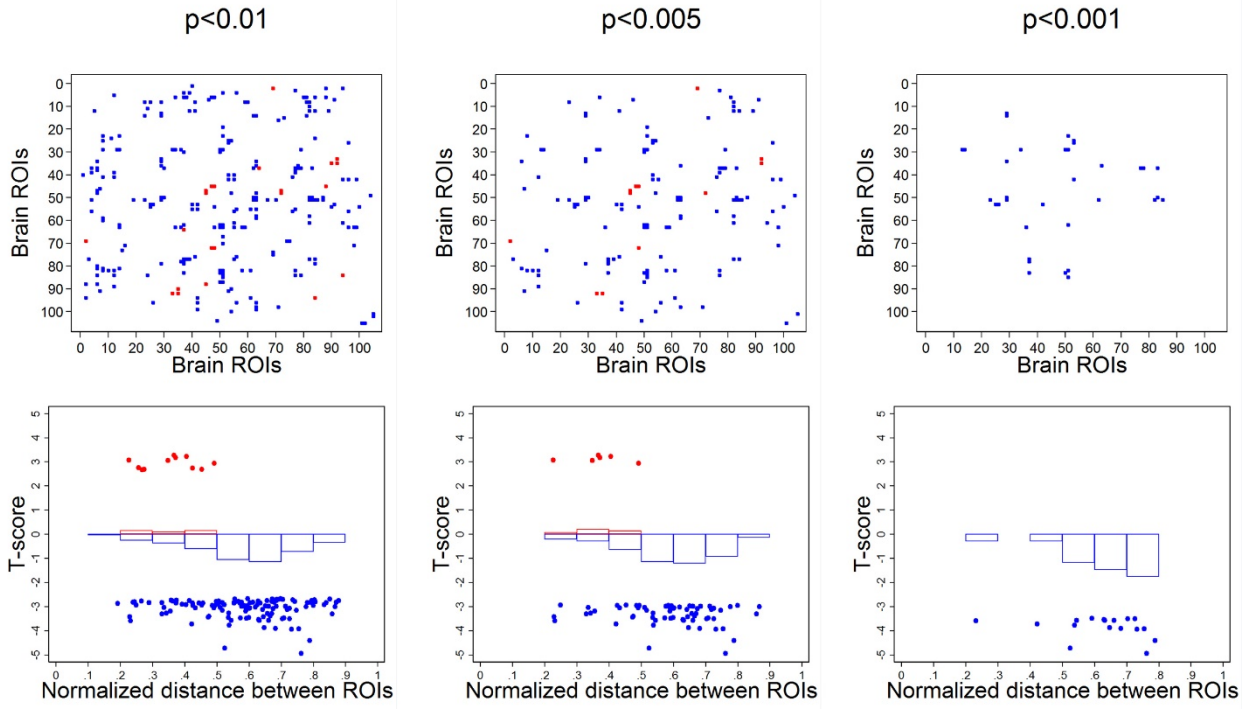

(b) Years of education

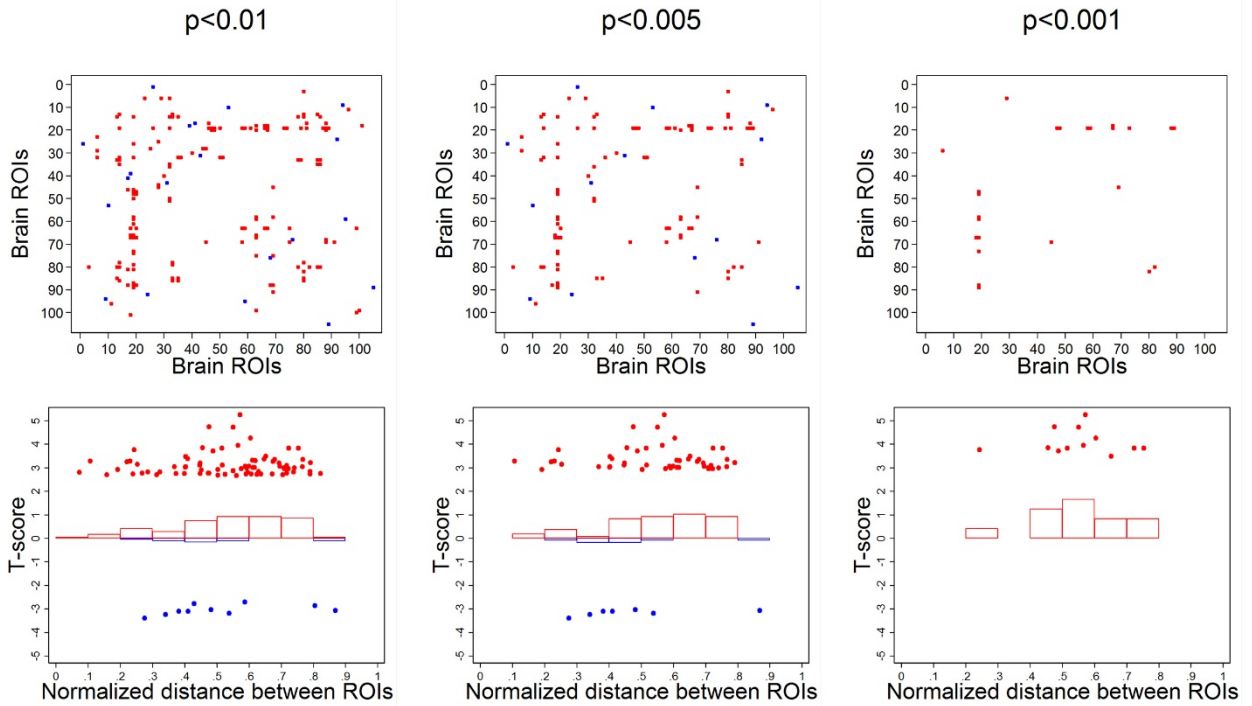

(c) Social network size

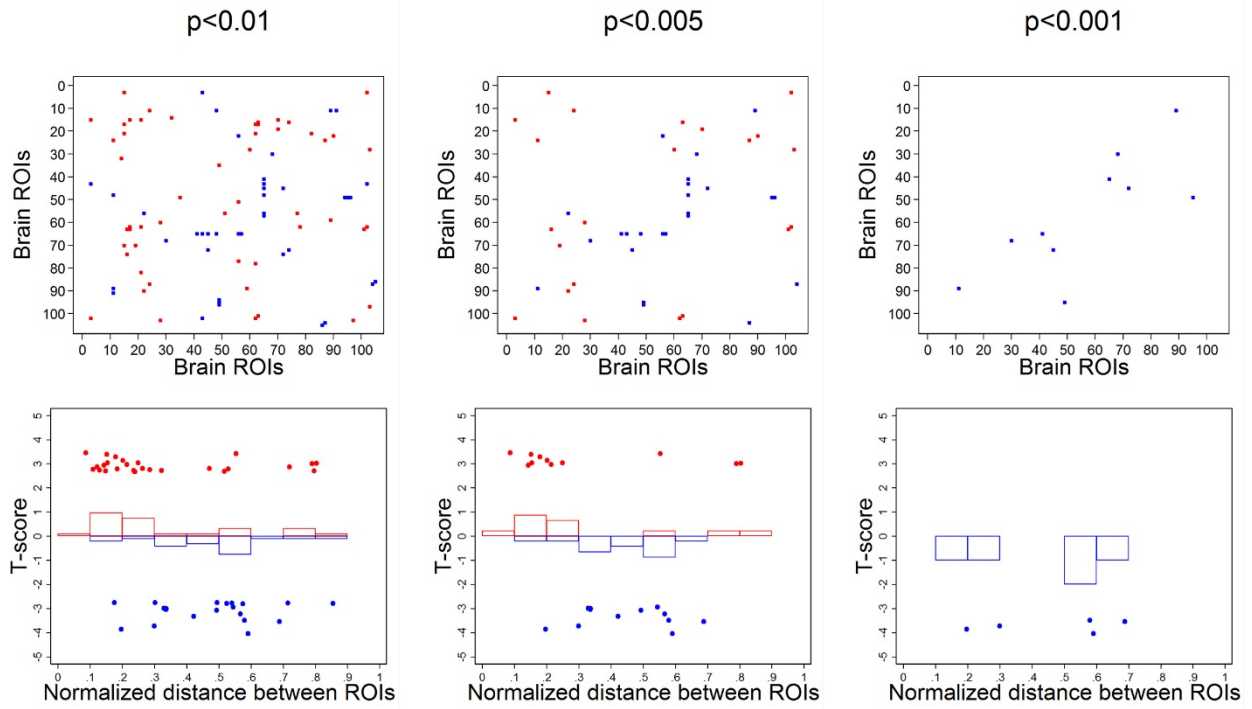

(d) Social network embeddedness (continuous)

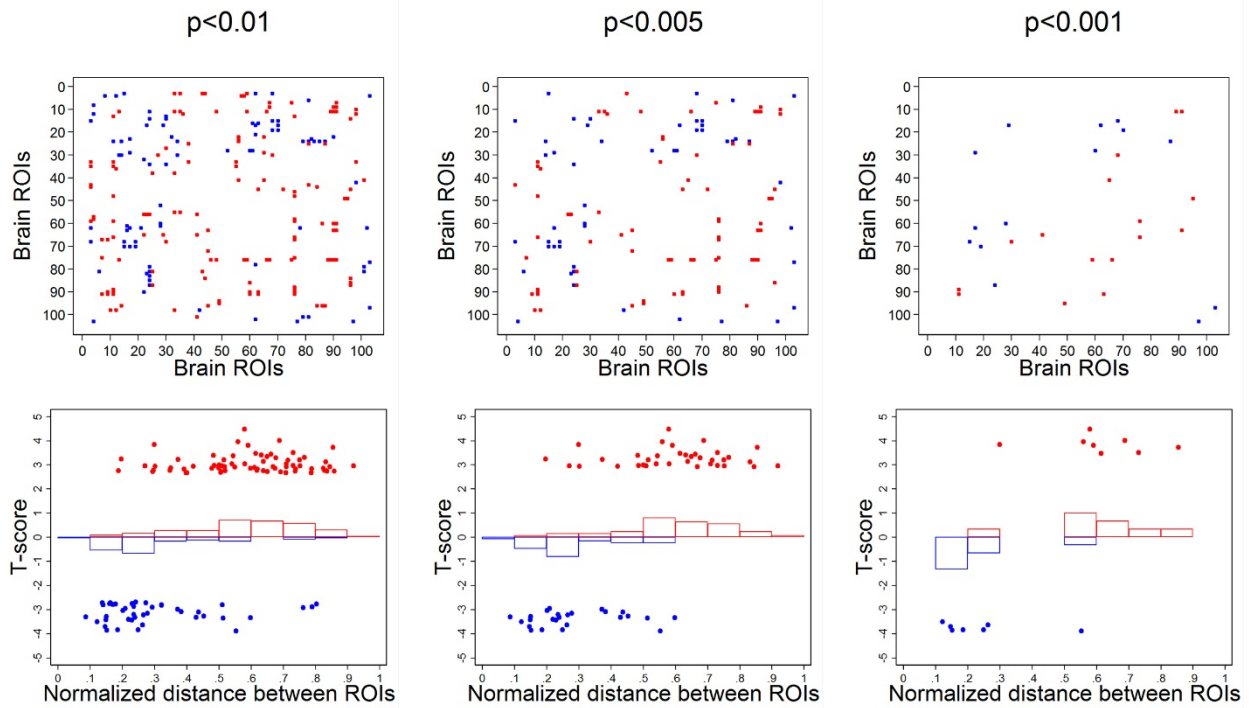



(e) Social network embeddedness (low=0, high=1)

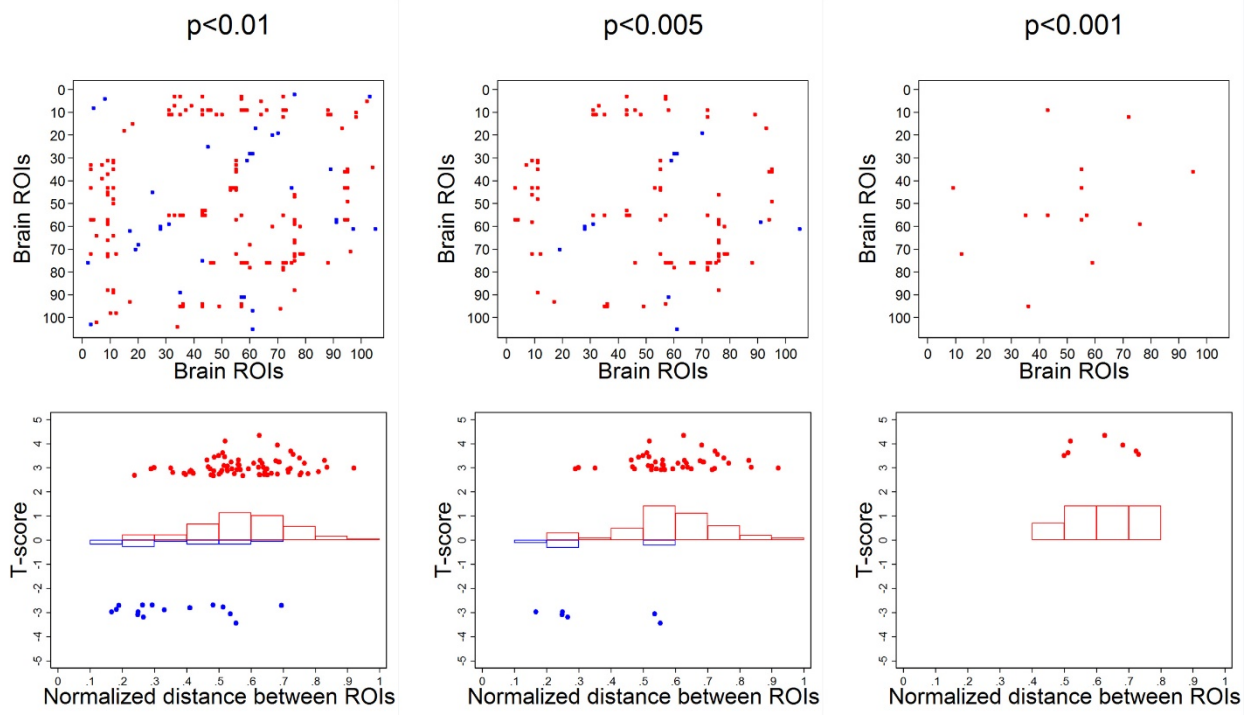

Figure S6. Pair-level associations between functional connectivity and individual characteristics (regions from the Harvard-Oxford probabilistic atlas).

(a) Age

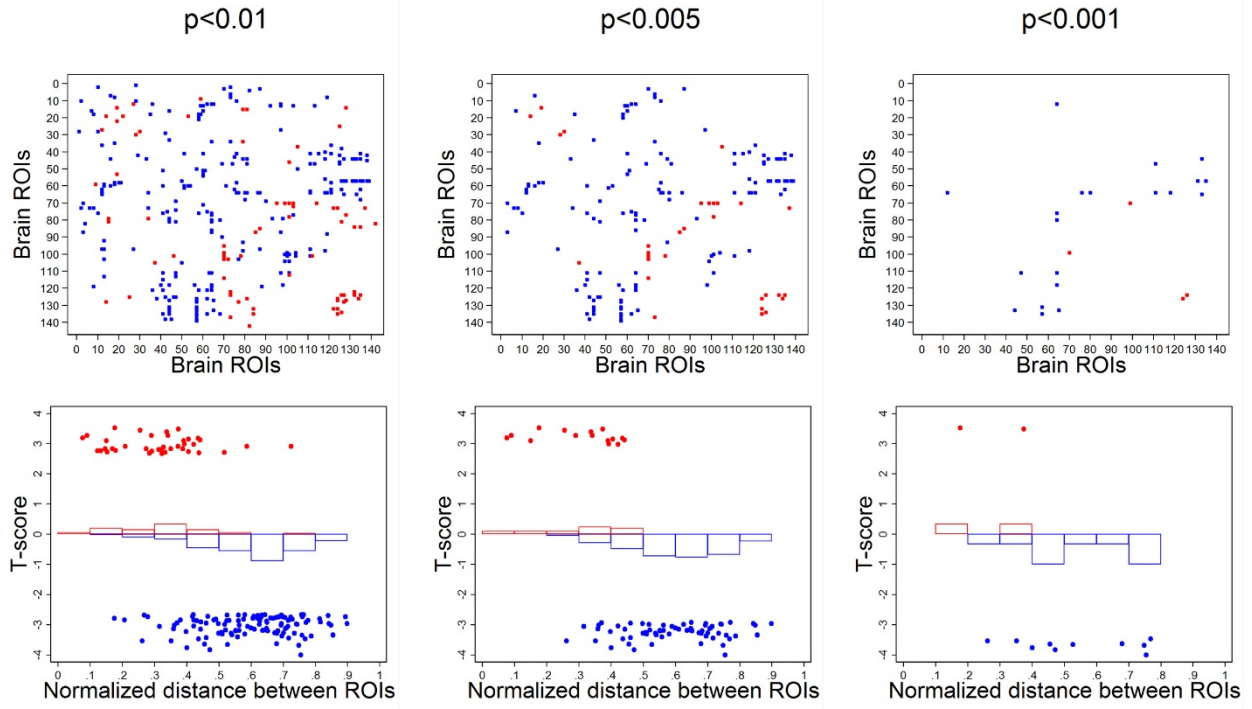

(b) Years of education

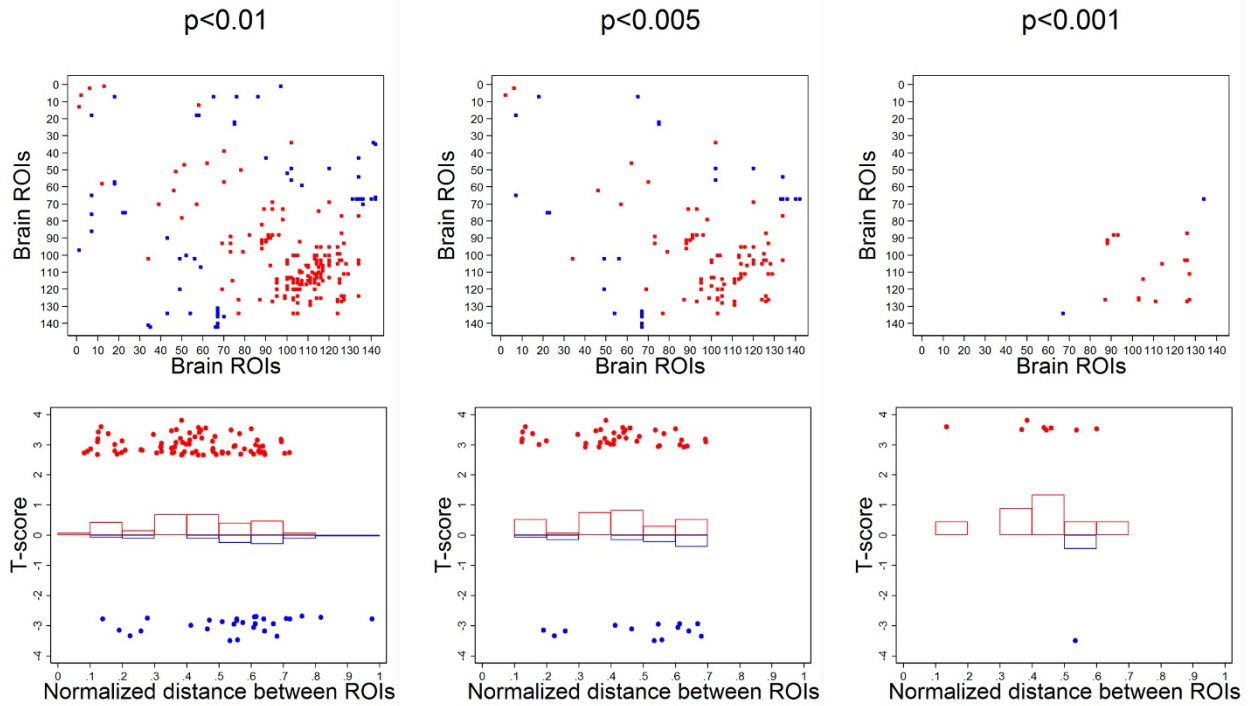

(c) Social network size

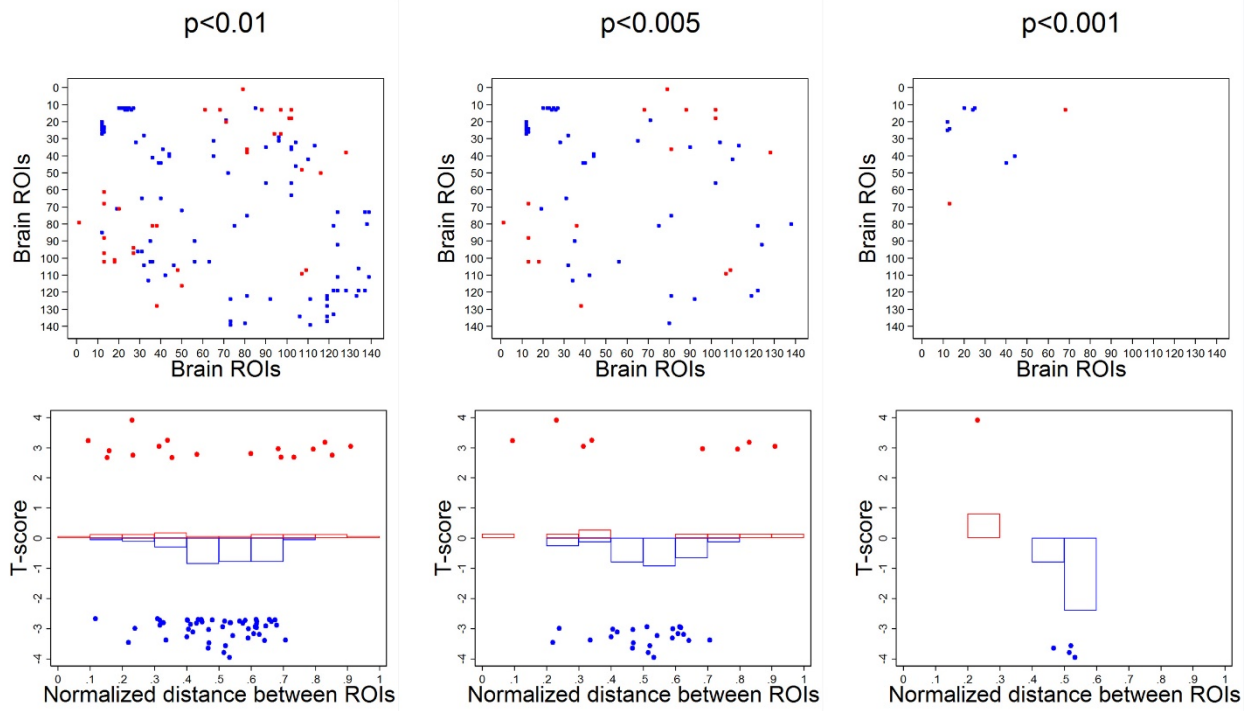

(d) Social network embeddedness (continuous)

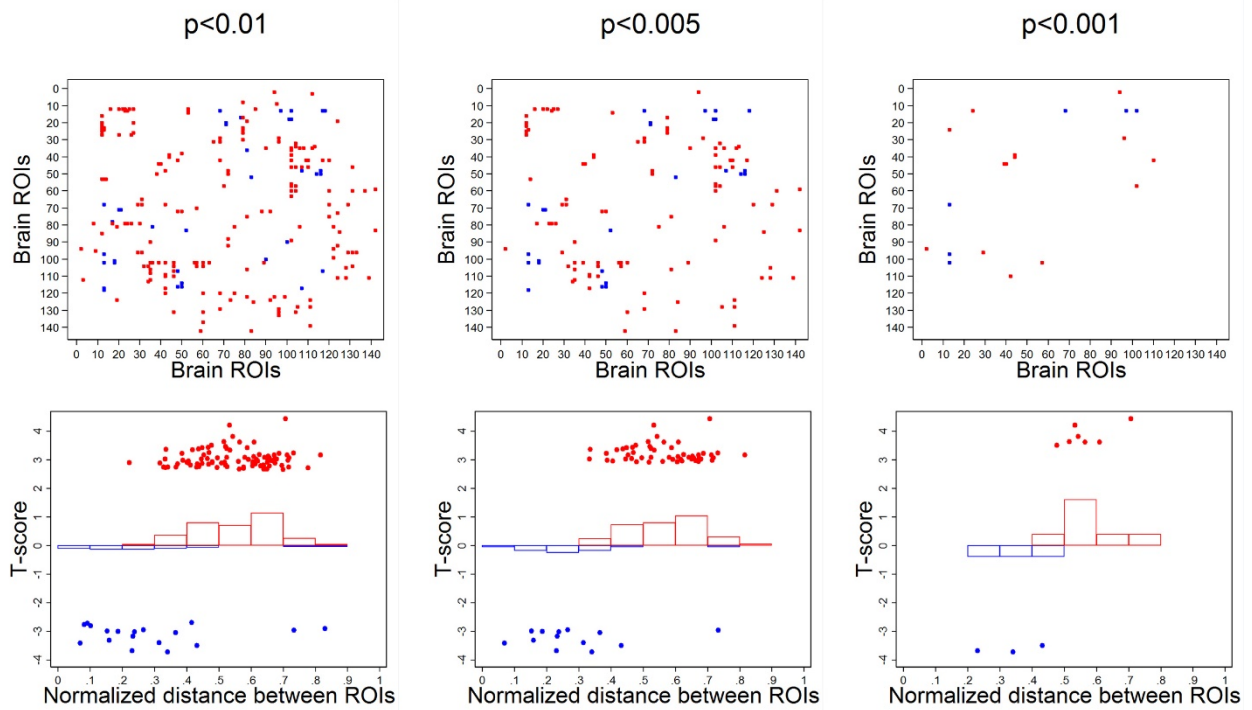

(e) Social network embeddedness (low=0, high=1)

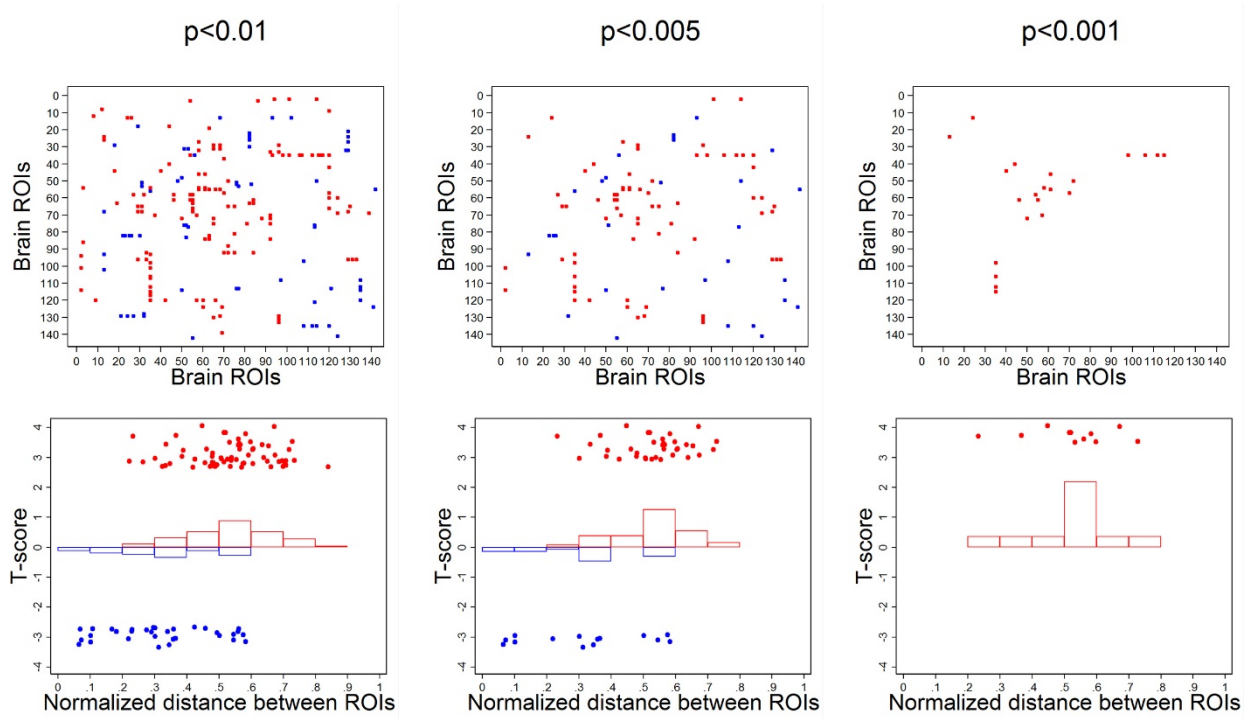

Figure S7. Pair-level associations between functional connectivity and individual characteristics (regions from the Dosenbach atlas).

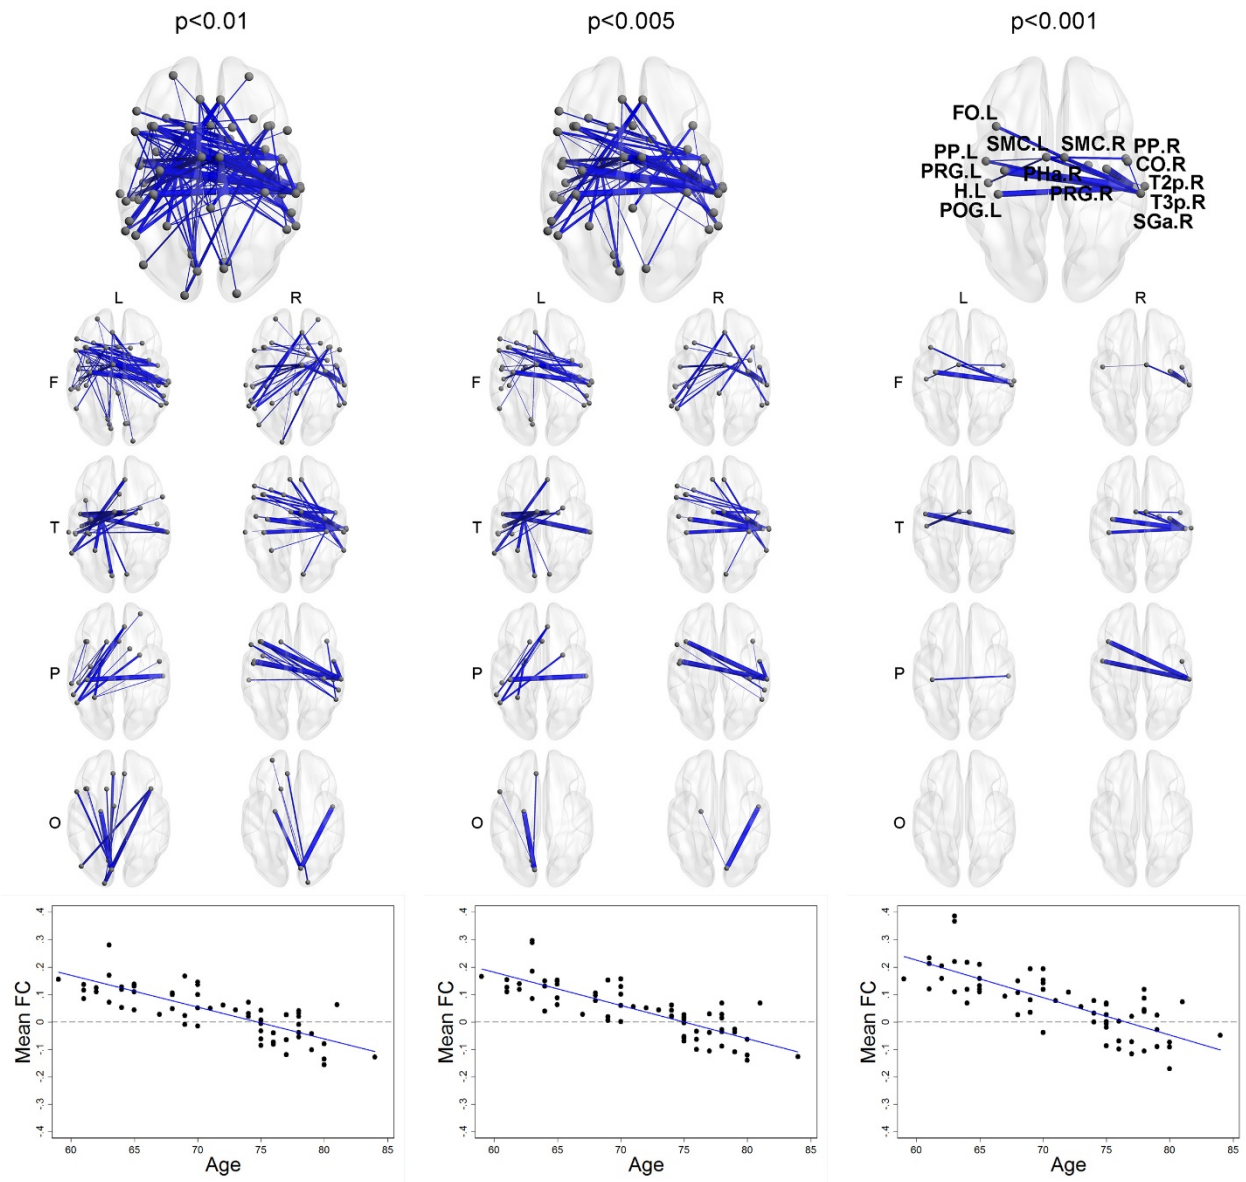

Figure S8. Component-level associations between functional connectivity and age (regions from the Harvard-Oxford probabilistic atlas).

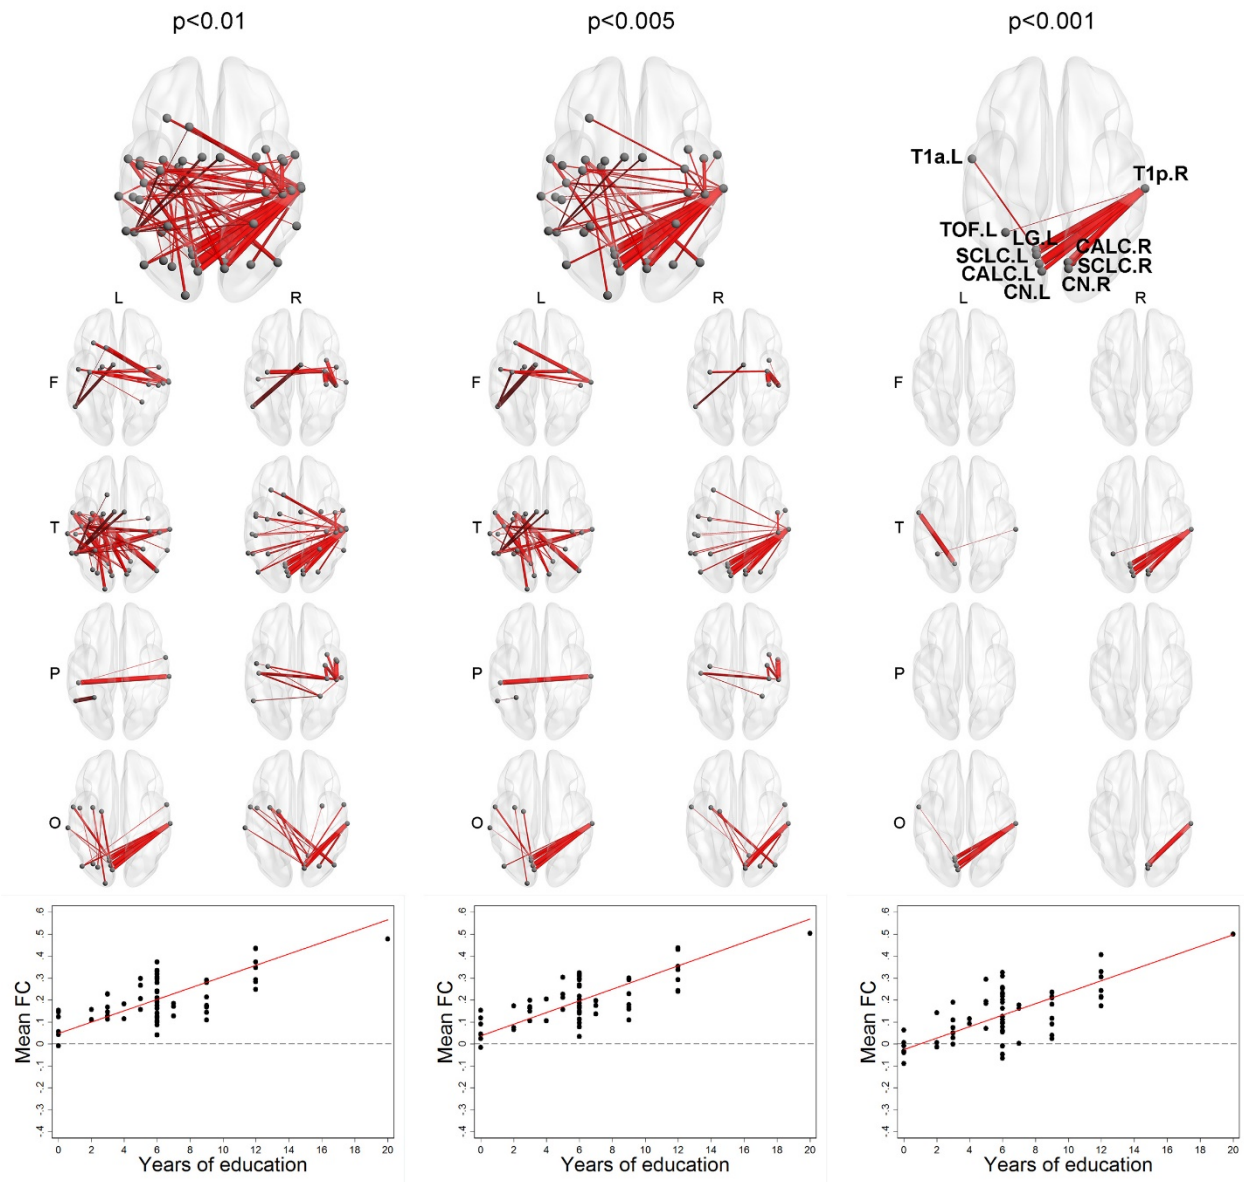

Figure S9. Component-level associations between functional connectivity and years of education (regions from the Harvard-Oxford probabilistic atlas).



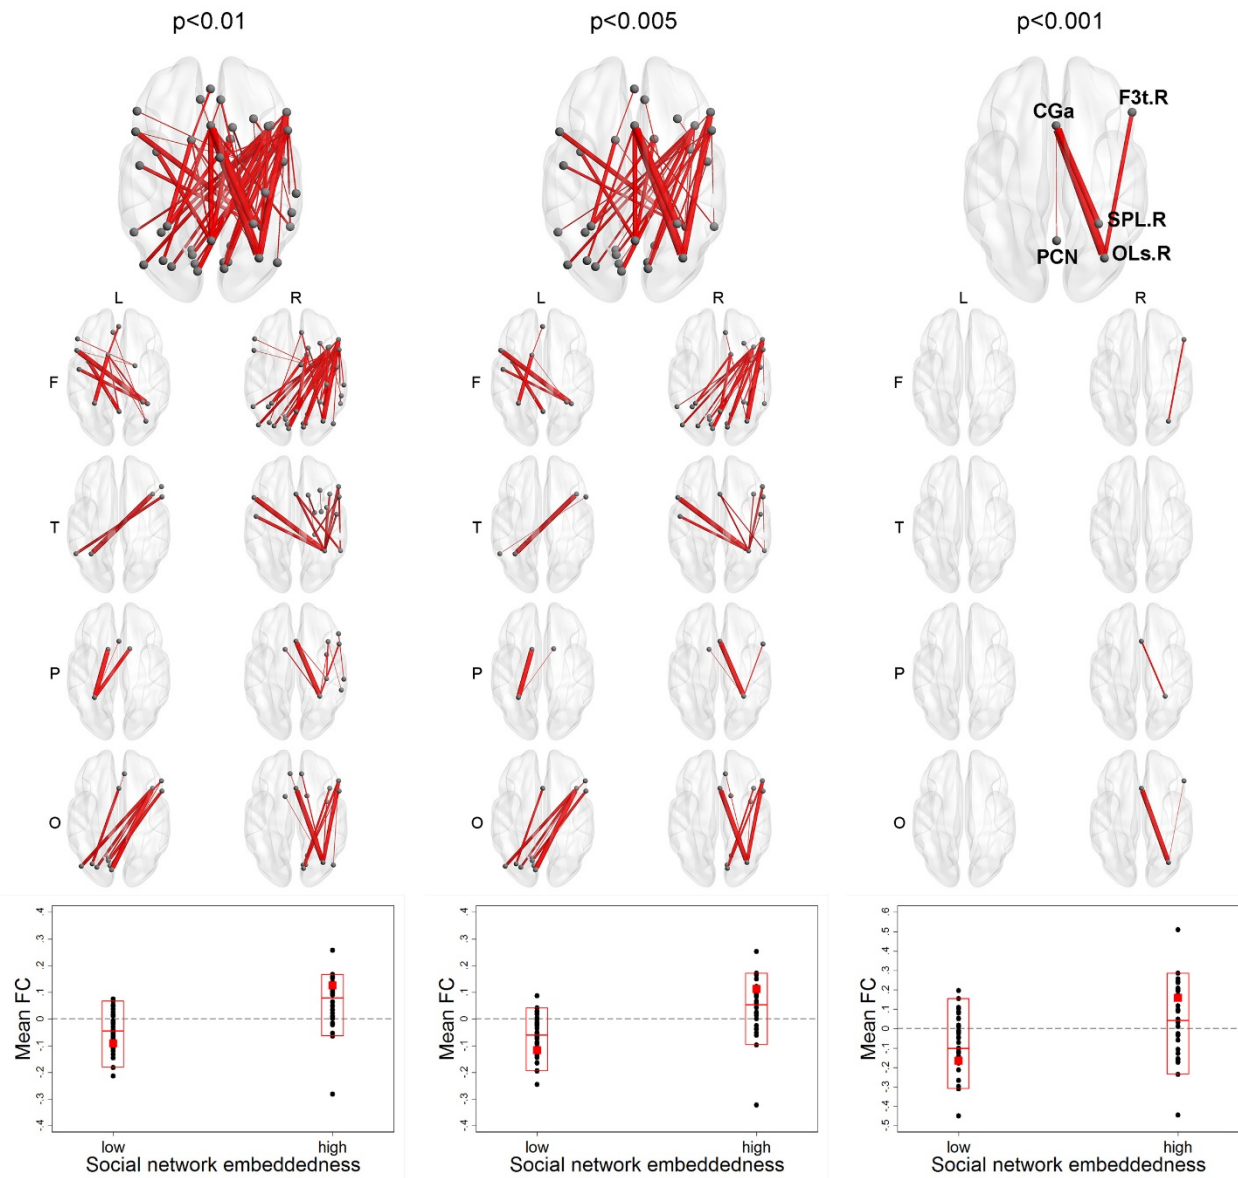

Figure S10. Component-level associations between functional connectivity and social network embeddedness (low=0, high=1) (regions from the Harvard-Oxford probabilistic atlas).

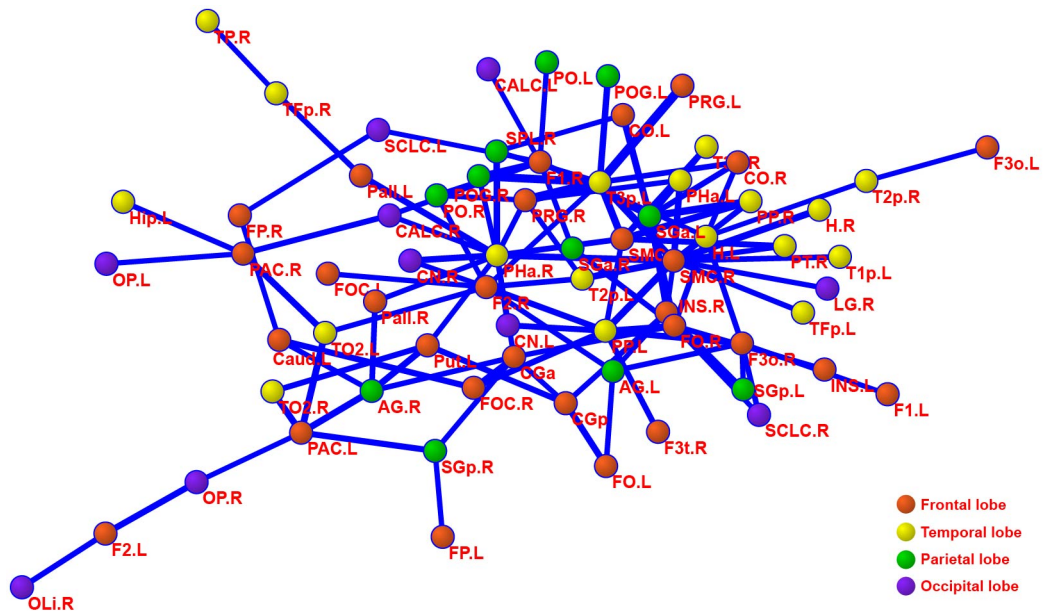

Figure S11. Network component associated with age ( $p < 0.01$ , regions from the Harvard-Oxford probabilistic atlas).
